1 **Bromodomain factor 5 is an essential transcriptional regulator of the *Leishmania* genome.**

2

3 Nathaniel G. Jones<sup>1\*</sup>, Vincent Geoghegan<sup>1</sup>, Gareth Moore<sup>1</sup>, Juliana B. T. Carnielli<sup>1</sup>, Katherine  
4 Newling<sup>1</sup>, Félix Calderón<sup>2</sup>, Raquel Gabarró<sup>2</sup>, Julio Martín<sup>2</sup>, Rab Prinjha<sup>3</sup>, Inmaculada Rioja<sup>3</sup>,  
5 Anthony J. Wilkinson<sup>4</sup>, Jeremy C. Mottram<sup>1</sup>.

6

7 1: York Biomedical Research Institute and Department of Biology, University of York, United  
8 Kingdom

9

10 2: GlaxoSmithKline Global Health, Tres Cantos, 28760, Madrid, Spain

11

12 3: Immunology Research Unit, Research, R&D GlaxoSmithKline, Gunnels Wood Road,  
13 Stevenage, Herts, SG1 2NY, UK

14

15 4: York Biomedical Research Institute and York Structural Biology Laboratory, Department of  
16 Chemistry, University of York, United Kingdom

17

18 \*Corresponding author.

19

20 **Keywords:** Bromodomain, Epigenetics, *Leishmania*, DiCre, Proximity proteomics,  
21 transcription.

22

23 **Abstract**

24 *Leishmania* are unicellular parasites that cause human and animal disease. Alongside other  
25 organisms in kinetoplastida, they have evolved an unusual genome architecture that requires  
26 all RNA polymerase II transcribed genes to be expressed constitutively, with transcriptional  
27 start regions denoted by histone variants and histone lysine acetylation. However, the way  
28 these chromatin marks are interpreted by the cell is not understood. Seven predicted  
29 bromodomain factors (BDF1-7), the reader modules for acetyl-lysine, were identified across  
30 *Leishmania* genomes. Using *L. mexicana* as a model, Cas9-driven gene deletions indicate that  
31 BDF1-5 are essential for promastigote survival, whilst DiCre inducible gene deletion of the  
32 dual bromodomain factor *BDF5* identified it to be essential for both promastigotes and  
33 amastigotes. ChIP-seq assessment of BDF5s genomic distribution revealed it as highly  
34 enriched at transcriptional start sites. Using an optimised proximity proteomic and  
35 phosphoproteomic technique, XL-BioID, we defined the BDF5-proximal environment to be  
36 enriched for other bromodomain factors, histone acetyltransferase 2, and proteins essential  
37 for transcriptional activity and RNA processing. Inducible deletion of BDF5, led to a disruption  
38 of pol II transcriptional activity and global defects in gene expression. Our results indicate the  
39 requirement of *Leishmania* to interpret histone acetylation marks for normal levels of gene  
40 expression and thus cellular viability.

41

## 42 Introduction

43

44 Gene transcription in eukaryotic cells is a complex process with multiple levels of regulation<sup>1</sup>.  
45 Post-translational modifications (PTMs) of histones in nucleosomes can be used to encode an  
46 extra layer of information into chromatin, to modify transcriptional activity leading to  
47 differential gene expression. Histone modification by lysine acetylation is one predominant  
48 modification, it is interpreted by 'reader' proteins called bromodomains. In eukaryotic  
49 pathogens such as *Leishmania*, an organism with an unusual genome arrangement, the  
50 impact of histone lysine acetylation on transcriptional regulation is not well understood.

51

52 Bromodomains are small protein domains consisting of 100-110 amino acid residues folded  
53 into a bundle of 4 helices connected by two loops which form a hydrophobic pocket that can  
54 bind to acetyl-lysine modified peptides. Conserved tyrosine and asparagine residues serve as  
55 acetyl-lysine recognition elements along with a network of water molecules in the pocket<sup>2-</sup>  
56 <sup>4</sup>. Bromodomains are classically found to recognise acetyl-lysine residues of histone tails,  
57 allowing bromodomain-containing proteins to act as interpreters of the histone acetylation  
58 code. Proteins containing bromodomains are often called bromodomain factors (BDFs). Other  
59 accessory domains in the BDF or its binding partners can then conduct other functions such  
60 as applying additional PTMs or chromatin remodelling. BDFs can regulate processes at specific  
61 regions of genomes such as promoters or enhancers, influencing differential gene expression,  
62 leading to cellular proliferation or differentiation. Inhibitors of these interactions have been  
63 intensely explored to identify pharmacological interventions for diseases driven by  
64 dysregulated BDF-driven processes<sup>3-6</sup>.

65

66 Bromodomain proteins are poorly studied in kinetoplastid species, such as *Leishmania*, the  
67 causative agents of multiple human and animal diseases. Visceral leishmaniasis infects 50,  
68 000 – 90, 000 people per year and the cutaneous forms of the disease, including those caused  
69 by *L. mexicana*, afflict up to 1 million people per year<sup>7</sup>. Kinetoplastids are deeply branched  
70 eukaryotes and their gene expression is radically different to the human host<sup>8</sup>. Genes are  
71 arranged into unidirectional polycistronic transcription units (PTU) of hundreds of non-  
72 functionally linked genes, and expression is driven from vaguely defined transcriptional start  
73 sites (TSS) that are often thousands of bases long<sup>9</sup>. The PTUs can run on either the plus or  
74 minus strand from transcriptional start sites at divergent strand switch regions<sup>10</sup>. Where PTUs  
75 then meet, a convergent SSR occurs, these are transcriptional termination sites (TTS). During  
76 transcription of protein-coding genes, RNA polymerase II (pol II) generates polycistronic pre-  
77 mRNAs that are processed by co-transcriptional cleavage, polyadenylation and trans-splicing  
78 events to produce mature mRNAs. Expression levels of individual genes are then typically  
79 regulated by the 3' UTR, which is targeted by RNA binding proteins for stabilisation,  
80 sequestration or degradation<sup>11</sup>. In *Leishmania*, some highly expressed genes are found in  
81 tandem arrays or on supernumerary chromosomes to increase gene dosage<sup>12</sup>. *Leishmania*  
82 also exhibit high levels of mosaic aneuploidy in cell populations as an adaptive survival

83 strategy allowing plastic variation in gene dose<sup>13</sup>. Consequently, transcription of protein-  
84 coding genes by polymerase II was thought to be constitutive with no sequence-defined,  
85 promoter-specific regulation<sup>14</sup>. However, it appears that cellular demarcation of  
86 transcriptionally start sites might be mediated through histone acetylation to provide a  
87 platform of accessible chromatin. This suggestion comes from the identification of H3  
88 acetylation at TSSs in *L. major*<sup>14</sup>. Histone acetyltransferases have been identified as essential  
89 for *L. donovani* survival and linked to specific histone modifications<sup>15–18</sup>.

90

91 *Leishmania* is particularly poorly understood in terms of its transcriptional regulation by  
92 acetylation; however, because of the high level of synteny and conservation of their genomic  
93 features to *Trypanosoma*, some of their core epigenetic processes may also be conserved.  
94 TSSs in *Trypanosoma brucei* are enriched for histone variants and acetylation marks<sup>19</sup>, the  
95 number of different histone PTMs in *T. brucei* has been shown to range into the hundreds  
96 <sup>20,21</sup>. Recently, characterisation of chromatin-associated proteins in *T. brucei* led to the  
97 identification of specific networks of bromodomain factors and other proteins at TSS and TTS,  
98 with characteristic ChIP-seq profiles suggesting a specific ordering and unexpected  
99 complexity of processes at these sites<sup>22</sup>. It has been reported that after genetic or chemical  
100 targeting of TbBDF2 and TbBDF3 in bloodstream stage *T. brucei*, cells undergo a process  
101 consistent with aberrant differentiation to the insect stage forms, identifying a potential role  
102 in the lifecycle of the parasite<sup>23</sup>. Several BDFs have been shown to be essential in multiple life  
103 stages of *T. brucei* by using a genome-wide RNAi screen<sup>24</sup>. TbBDF5 has been individually  
104 targeted by RNAi in bloodstream forms and found to be essential for cellular survival<sup>25</sup>. In  
105 *Trypanosoma cruzi* bromodomain factors TcBDF1 and TcBDF3 have been implicated in cellular  
106 differentiation, intriguingly TcBDF1 has been reported to localise to glycosomes and TcBDF3  
107 has been reported to interact with acetylated tubulin in the flagellum<sup>26–28</sup>. TcBDF2 has been  
108 reported to bind acetylated histone TcH4K10<sub>ac</sub> and accumulates in cells treated with UV  
109 radiation<sup>29</sup>. Until now, none of these orthologs have been characterised in *Leishmania*.

110

111 In this work, we validate five bromodomains factors as essential in *Leishmania* and  
112 characterise the biology co-ordinated by the essential bromodomain factor, BDF5. By  
113 applying inducible gene deletion, we were able to establish the requirement for BDF5 in both  
114 cell culture and a mammalian host. We applied multiple -omics tools to characterise the  
115 function of BDF5, in particular using ChIP-seq to define the genomic distribution of BDF5,  
116 proximity proteomics to determine the processes occurring in BDF5-enriched loci and RNA-  
117 seq to explore the role of BDF5 in gene expression. Integrating the findings of these  
118 approaches we defined BDF5 as an essential factor required for pol II transcriptional activity  
119 in *Leishmania*.

120

121

122 **Results**

123 **Bromodomain factors in *Leishmania***

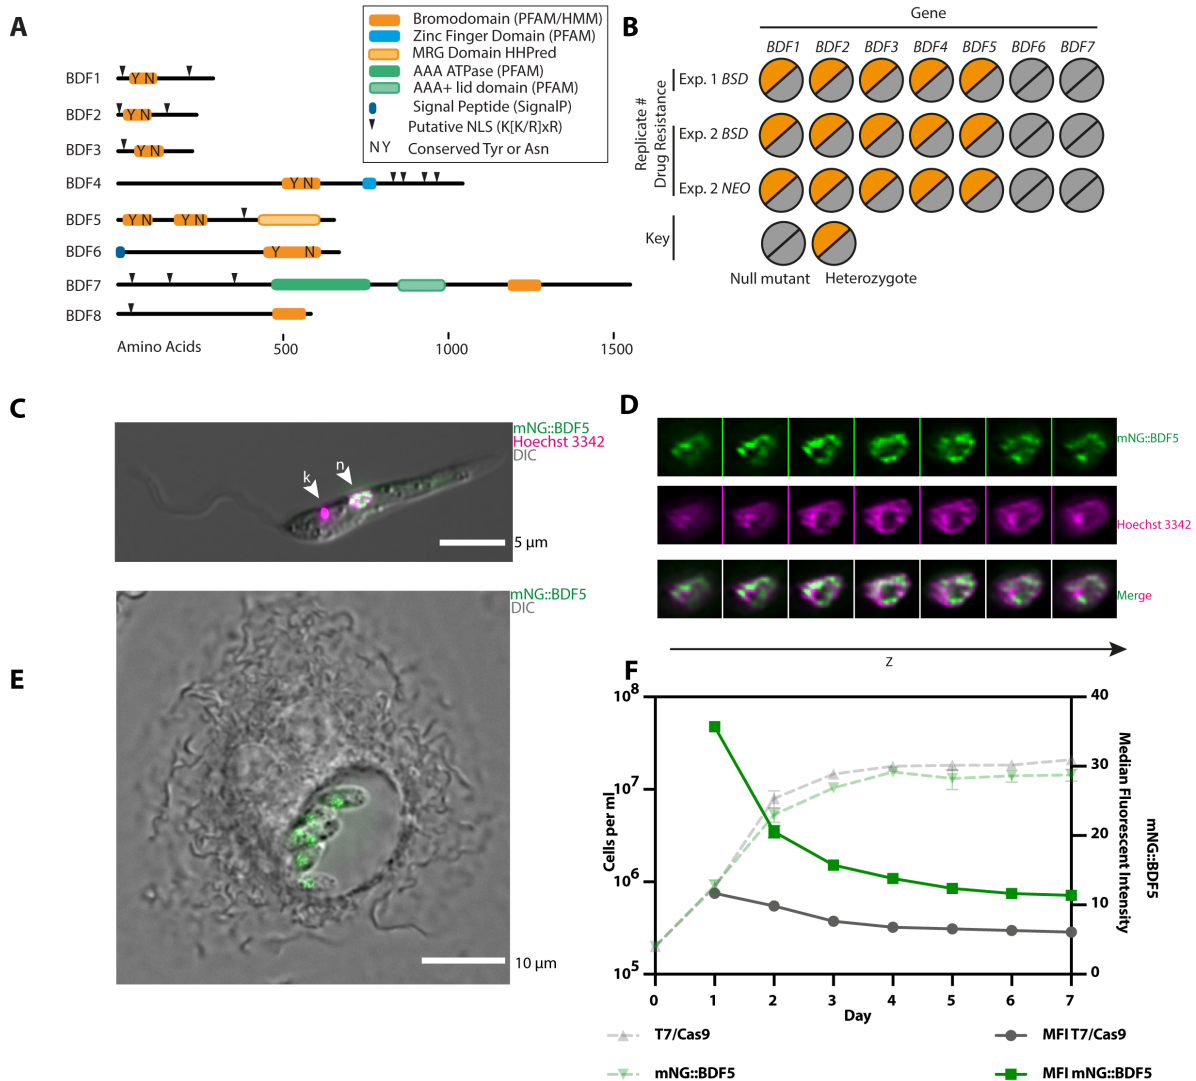

124  
 125 **Figure 1: Overview of putative *Leishmania* bromodomain factors.** **A.** Schematic showing  
 126 protein domain architecture of *Leishmania* BDFs. **B.** Overview of Cas9 gene deletion attempts  
 127 of *BDF1-7* in *L. mexicana* *T7/Cas9* promastigotes. Two independent transfections were carried  
 128 out using either *BSD* or *NEO* as a drug selectable marker individually or in combination. **C.** Live-  
 129 cell fluorescent microscopy of *L. mexicana* promastigote expressing mNG::BDF5. Nucleus is  
 130 denoted by arrowhead labelled n, the kinetoplast DNA is indicated by arrowhead labelled k.  
 131 **D.** Channel separated Z-slices of the nucleus from the cell in (C). **E.** Live-cell fluorescent  
 132 microscopy of intra-macrophage *L. mexicana* amastigotes expressing mNG::BDF5  
 133 endogenously-tagged protein. **F.** Expression levels of mNG::BDF5 during promastigote growth,  
 134 determined by mNG signal in individual cells by flow-cytometry. Dashed points denote mean  
 135 cell density, error bars  $\pm$  standard deviation, solid points denote median fluorescence intensity,  
 136 N=3, 20, 000 events per sample.

137  
 138 Although bromodomain factors BDF1-5 were readily identifiable in *Leishmania* genomes<sup>30</sup>,  
 139 further PFAM and HMM searching identified another two potential bromodomain-containing  
 140 proteins BDF6 and BDF7 (**Fig. 1A, Table 1**) (Tallant, C, et al. In Press doi).



141 10.1021/acsinfecdis.1c00387). BDF1-5 have identifiable tyrosine and asparagine residues in  
142 positions consistent with the conserved residues important for peptide binding in canonical  
143 bromodomains. BDF1-3 are small proteins <500 residues and contain a single bromodomain  
144 and no other identifiable domains. BDF4 is a larger protein with a centrally located  
145 bromodomain followed by a predicted CW-type zinc finger. BDF5 is the only *Leishmania* BDF  
146 that has tandem bromodomains in the N-terminal half of the protein. We refer to these as  
147 BD5.1 and BD5.2 and both are located in the N-terminal half of the protein. A more sensitive  
148 HHPred<sup>31</sup> analysis suggested remote structural homology to an MRG domain-like region  
149 (MORF4 (mortality factor on chromosome 4) related gene) in the C-terminal half of the BDF5  
150 protein. MRG domains can bind transcriptional regulators and chromatin remodelling  
151 factors<sup>32-34</sup>. BDF6 and BDF7 contain the most divergent bromodomains. BDF6 includes an  
152 insert in the bromodomain region and BDF7 lacks the conserved tyrosine and asparagine  
153 residues, suggesting that they may be divergent, noncanonical bromodomains or pseudo-  
154 bromodomains<sup>35</sup>. BDF6 has a C-terminal bromodomain and is predicted to have an N-terminal  
155 signal peptide when analysed using SignalP4.1. BDF7 is the largest of the BDFs and contains a  
156 bromodomain in the C-terminal region of the protein preceded by a predicted ATPase and  
157 AAA domain. The bromodomain does not appear to have the conserved tyrosine and  
158 asparagine residues that are important for acetyl-lysine binding. However, by HMMER  
159 analysis and alignment, it appears that BDF7 might be a homologue of the ATAD2 factor found  
160 in many other eukaryotes<sup>36-38</sup>. All of the predicted BDFs, apart from BDF6, contain  
161 K[K/R]x[K/R] motifs that can act as a monopartite nuclear localisation signal<sup>39</sup>. The BDFs of  
162 *Leishmania* have orthologs in other parasitic and free-living kinetoplastid organisms, except  
163 for BDF1 in *Bodo saltans*<sup>40,41</sup>. BDF8 was identified by HHPred analysis of a hypothetical gene  
164 identified using BDF5-proximity proteomics (this study), it may represent another pseudo-  
165 bromodomain.

166  
167 To assess the essentiality of the seven BDFs in *Leishmania* promastigotes we used Cas9-  
168 targeted gene deletion. sgRNAs and repair templates were generated to target the CDS of  
169 each gene and replace it completely (**Fig. S1A**)<sup>42</sup>. Two independent experiments were  
170 performed, using either blasticidin (*BSDI* or *BSD* and neomycin (*NEO*) drug resistance repair  
171 cassettes, leading to three semi-independent selections. Consistently, BDF6 and BDF7 null  
172 mutants could be isolated (**Fig. 1B, Fig. S1B, S1C, S1D**). For BDF1-5 only heterozygote mutants  
173 were ever isolated, indicating that although the Cas9 system was functioning, a copy of the  
174 gene was required for promastigote survival and thus null mutants could not be generated.

175  
176 LmxBDF5, while distinct from BET bromodomains, shares a characteristic tandem  
177 bromodomain arrangement reminiscent of human BRD2 and BRD4, or the yeast RSC4  
178 protein<sup>4</sup>. These proteins have all been identified to play roles in regulating transcription, so  
179 due to this interesting feature of BDF5 we decided to investigate it in greater detail. BDF5  
180 homologs are identifiable in all the kinetoplastid genomes available in TriTrypDB. The level of  
181 amino acid conservation across the first bromodomain (BD5.1) is higher than the second

182 (BD5.2), but in all cases the conserved tyrosine and asparagine residues are retained in both  
 183 bromodomains (**Fig. S2A**), these correspond to Y40, N90, Y201 and N247 in LmxBDF5. Both  
 184 bromodomains have x-ray crystal structures available in the PDB (PDB ID: 5TCM, 5TCK),  
 185 confirming the bromodomain structural fold and positioning of conserved residues (**Fig. S2B**).  
 186 BDF5 was endogenously tagged using a Cas9 targeted approach to append a 3xMyc epitope  
 187 and the green fluorescent protein mNeonGreen to the N-terminus<sup>42</sup> to generate *mNG::BDF5*.  
 188 This modification preserves the 3' UTR, which is necessary for regulating endogenous mRNA  
 189 levels in *Leishmania* allowing for native expression levels and dynamics through growth and  
 190 lifecycle stages. Live-cell widefield deconvolution microscopy of promastigotes identified that  
 191 mNG::BDF5 localised to the nucleus (**Fig. 1C**). The distribution of mNG::BDF5 within the  
 192 nucleus was heterogeneous, with foci found around the periphery of the nucleus and  
 193 excluded from the nucleolus (**Fig. 1D**). The expression of mNG::BDF5 persisted in amastigotes  
 194 where it was visualised in a structure consistent with the nucleus of intramacrophage  
 195 amastigotes (**Fig. 1E**). *BDF5* mRNA was also previously detected to be constitutively expressed  
 196 in both lifecycle stages<sup>43</sup>. A seven-day time course experiment was performed where  
 197 mNG::BDF5 levels in individual cells were measured by flow cytometry to determine the  
 198 levels of BDF5 during promastigote growth (**Fig. 1F**). mNG::BDF5 levels were highest in rapidly  
 199 proliferating cells during the first few days of growth and declined as the cells approached  
 200 stationary phase. By day 7, mNG::BDF5 levels were reduced by >60% compared to day 2.  
 201 mNG::BDF5 signal was not completely reduced to the levels of the parental control strain,  
 202 suggesting a low level of BDF5 expression was retained.

203

204 **Table 1: Gene IDs for *L. mexicana* BDFs and orthologues in selected trypanosomatids.** PDB  
 205 identifiers are provided for available structures, shaded boxes represent likely pseudo-  
 206 bromodomains.

| Name        | <i>L. mexicana</i><br>gene | <i>L. donovani</i><br>gene | PDB<br>ID     | <i>T. brucei</i><br>orthologue | PDB<br>ID              | <i>T. cruzi</i><br>orthologue | PDB<br>ID     |
|-------------|----------------------------|----------------------------|---------------|--------------------------------|------------------------|-------------------------------|---------------|
| <b>BDF1</b> | LmxM.36.6880               | LdBPK_367210.1             |               | Tb927.10.8150                  | 5KO4                   | TcCLB.506247.80               |               |
| <b>BDF2</b> | LmxM.36.2980               | LdBPK_363130.1             | 5C4Q          | Tb927.10.7420                  | 4PKL,<br>5CZG,<br>2N9G | TcCLB.507769.30               | 6NP7,<br>6NIM |
| <b>BDF3</b> | LmxM.36.3360               | LdBPK_363520.1             | 5FEA          | Tb927.11.10070                 | 5C8G                   | TcCLB.509747.110              |               |
| <b>BDF4</b> | LmxM.14.0360               | LdBPK_140360.1             |               | Tb927.7.4380                   |                        | TcCLB.508857.150              |               |
| <b>BDF5</b> | LmxM.09.1260               | LdBPK_091320.1             | 5TCM,<br>5TCK | Tb927.11.13400                 | 5K29,<br>6NEZ          | TcCLB.510359.130              | 6NEY          |
| <b>BDF6</b> | LmxM.12.0430               | LdBPK_120390.1             |               | Tb927.1.3400                   |                        | TcCLB.510889.330              |               |
| <b>BDF7</b> | LmxM.11.0910               | LdBPK_110910.1             |               | Tb927.11.6350                  |                        | TcCLB.506297.110              |               |
| <b>BDF8</b> | LmxM.33.2300               | LdBPK_342070.1             |               | Tb927.4.2340                   |                        | TcCLB.506559.310              |               |

207

208

209

210 *BDF5* is essential in promastigotes and for murine infection

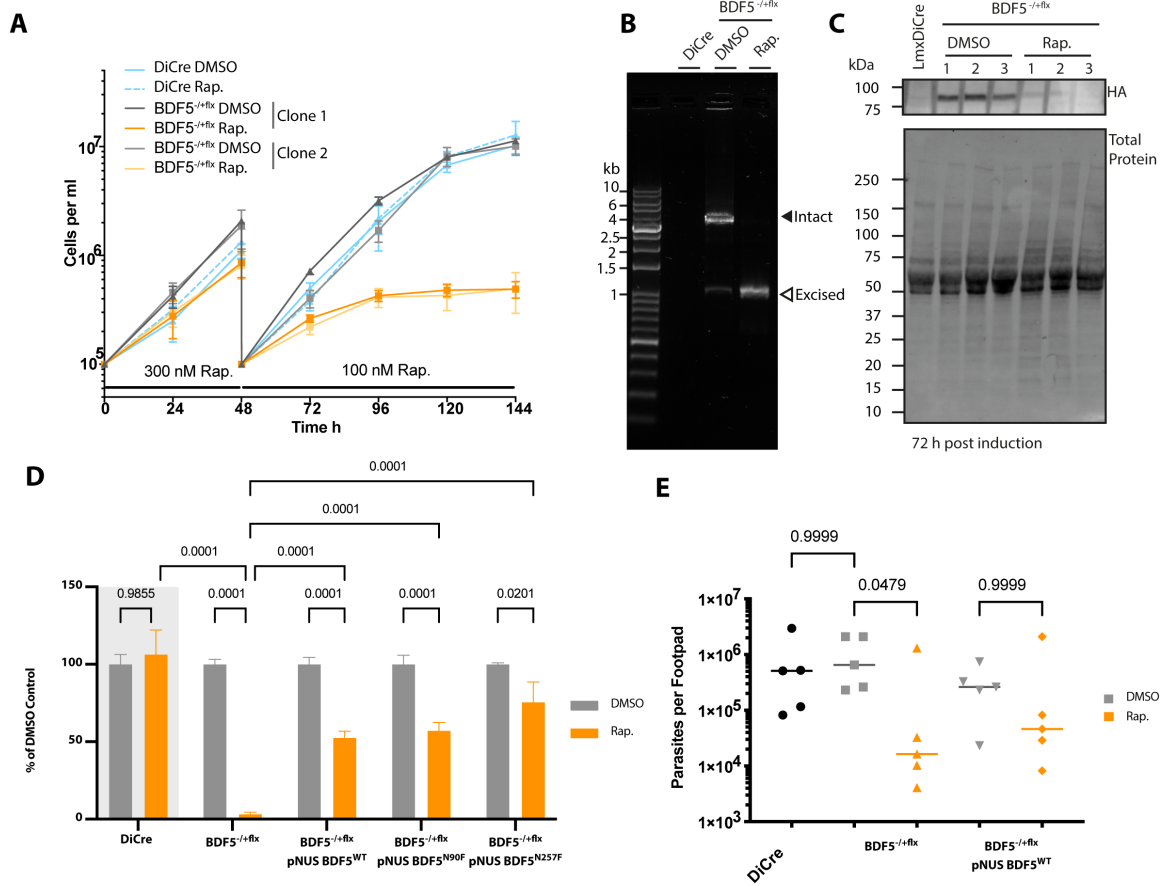

211  
 212 **Figure 2: Characterisation of inducible knockout of BDF5 using DiCre.** **A.** Growth curve of  
 213 promastigotes treated with the inducing agent, rapamycin (Rap.), or the vehicle, DMSO. Points  
 214 and error bars denote mean values  $\pm$  standard deviation,  $n=3$ . **B.** PCR and agarose gel analysis  
 215 of *BDF5::6xHA<sup>flx</sup>* gene excision at the 72 h timepoint in (A). Solid arrowhead denotes the intact  
 216 *BDF5::6xHA<sup>flx</sup>* gene and open arrowhead denotes the excised locus after rapamycin addition.  
 217 The DiCre lane indicates the lack of PCR product in the parental strain. **C.** Western blot showing  
 218 levels of *BDF5::6xHA* protein at the 72 h timepoint. **D.** Results of clonogenic survival assay  
 219 comparing *BDF5* depleted cells with cell lines carrying episomal complementation of *BDF5* or  
 220 mutated *BDF5* alleles. Bars denote the mean of the percentage clonal survival where each  
 221 experiment was normalised to its own DMSO control. Error bars indicate standard deviation,  
 222 values above are p values from 2-way ANOVA with multiple comparisons by Tukey's test,  $n=3$ .  
 223 Lines denote comparisons performed by two-way ANOVA with associated p-values shown  
 224 above **E.** Parasite burdens from infected mouse footpads determined by limiting dilution,  
 225 individual points for each mouse with median values indicated by lines. Comparisons of  
 226 Kruskal-Wallis test with Dunn's correction indicated with associated p-values written above,  
 227  $n=5$ .

228  
 229 To gain a higher quality validation of *BDF5* essentiality<sup>44</sup> and to investigate the phenotypes  
 230 resulting from loss of *BDF5* in promastigotes, an inducible knockout strain was generated  
 231 using the DiCre system<sup>45,46</sup> (**Fig. S2A, S2B**). An *L. mexicana* strain expressing dimerisable, split  
 232 Cre recombinase was modified to carry a single, 6xHA epitope-tagged allele of *BDF5* flanked  
 233 by loxP sites giving *L.mx::DiCre Δbdf5::BDF5::6xHA<sup>flx</sup>/BDF5*. The second copy of *BDF5* was

234 then deleted using a *HYG* resistance cassette giving the strain  
235 *L.mx::DiCre $\Delta$ bd5::HYG/ $\Delta$ bd5::BDF5::6xHA<sup>fllox</sup>*, referred to as *BDF5::6xHA<sup>-/+flx</sup>*. In the absence  
236 of rapamycin, this strain grew normally as per the parental DiCre strain. However, following  
237 the addition of rapamycin, there was a marked reduction in the parasite growth (**Fig. 2A**).  
238 Rapamycin was added to cultures at 300 nM for 48 h at which point the cultures were diluted  
239 to 1 x 10<sup>5</sup> cells per ml. Rapamycin was then added at 100 nM to suppress escape mutants  
240 and the growth phenotype observed. At the 144 h time point, the rapamycin-treated flasks  
241 contained ~98% fewer cells than the controls. Rapamycin did not affect the parental DiCre  
242 strain, indicating that the effect was specific to the floxed strain where *BDF5* could be deleted.  
243 This phenotype was reproducible and observed in an independent, clonal cell line (**Fig. 2A**).  
244 PCR analysis of these populations at 72 h after rapamycin addition revealed that the  
245 *BDF5::6xHA<sup>flx</sup>* allele had been excised (**Fig. 2B**). Some leaky excision of the *BDF5::6xHA<sup>flx</sup>* allele  
246 was detectable in the untreated control samples. The levels of BDF5::6xHA protein at 72 h  
247 were assessed by western blot, revealing a 90% reduction in the rapamycin-treated sample  
248 compared to the control samples (**Fig. 2C**). Total protein Stain-Free technology was used to  
249 provide loading controls, due to the potential for BDF5 deletion to impact on transcription of  
250 housekeeping genes. To demonstrate that the deletion of *BDF5* was essential for cellular  
251 survival a clonogenic assay was applied to characterise the cells resulting from *BDF5* excision  
252 (**Fig. 2D**). A 98% reduction in survival of the *BDF5::6xHA<sup>-/+flx</sup>* strain was observed when cloned  
253 in the presence of 100 nM rapamycin, moreover, those cells that survived retained the  
254 *BDF5::6xHA<sup>fllox</sup>* allele.

255  
256 To ensure the phenotype was specific to *BDF5* deletion and not due to off-target effects, an  
257 allele of *BDF5::GFP* was re-introduced to the *BDF5::6xHA<sup>-/+flx</sup>* strain using the pNUS episome<sup>47</sup>  
258 (**Fig. S4**) Clonal survival experiments were performed in media lacking drug selection for the  
259 episome allowing for its loss if it confers no selective advantage. Clonal survival of the BDF5-  
260 complementation strain was ~50% after rapamycin addition, this is 25-fold higher than the  
261 non-complemented, induced samples. While not 100% complementation it reflects the  
262 potential for parasites to lose the episome (**Fig. 2D**), demonstrating the requirement for BDF5  
263 for cellular survival. This experimental approach also allowed us to explore the essentiality of  
264 the individual bromodomains by making point mutations at the conserved asparagine  
265 residues in each bromodomain, N90 and N257 in BD5.1 and BD5.2 respectively (**Fig. S4**). These  
266 were mutated to phenylalanine in anticipation that the bulky sidechain would displace any  
267 binding peptide from the hydrophobic pocket<sup>2,48,49</sup>. Clonal survival was restored to similar  
268 levels as those observed for the pNUS *BDF5* complementation strain by the *BDF5<sup>N90F</sup>* and  
269 *BDF5<sup>N257F</sup>* mutants (**Fig. 2D**), indicating that either these mutations are not disruptive, or that  
270 any disruption due to mutation of a single BDF5 BD is tolerated by the cell. Three attempts  
271 were made to generate double mutations in N90F/N257F but no viable populations of cells  
272 were isolated, suggesting the *BDF5<sup>N90F/N257F</sup>* is not tolerated by the cells. In light of this, we  
273 used a DiCre inducible system<sup>50</sup> to flip-on expression of an extra *BDF5<sup>N90F/N257F</sup>::GFP* mutant  
274 allele to look for dominant-negative phenotypes (**Fig. S5A, Fig.S5B**). Promastigote cultures

275 induced to express BDF5<sup>N90F/N257F</sup>::GFP exhibited a significant growth defect (**Fig. S5C, S5D**),  
276 whereas those induced to express the BDF5::GFP protein did not exhibit this phenotype.  
277 These experiments demonstrate that individually both bromodomains are redundant, but  
278 that together they are required for the essential function of BDF5.

279

280 The ability to use the DiCre strains to validate target genes in *Leishmania* amastigotes is  
281 restricted due to the toxicity of rapamycin to amastigotes and its immunomodulatory effect  
282 in mammals<sup>45</sup>. Therefore, mid-log promastigote cultures of *Lmx::DiCre*, *BDF5::6xHA<sup>-/+flx</sup>* or  
283 *BDF5::6xHA<sup>-/+flx</sup> ::pNUS BDF5::GFP* were treated with 500 nM rapamycin or DMSO for 72 hours  
284 allowing them to induce deletion of BDF5 but still allow infectious, metacyclic promastigotes  
285 to accumulate in culture. Excision of the BDF5 gene was verified by PCR (**Fig. S6A**) and the  
286 stationary cultures were used to infect BALB/c mice by a subcutaneous route into the rear  
287 footpad. No apparent differences were observed in the size of the resulting footpad lesions  
288 over the 8-week infection period (**Fig. S6B**), however, there was a 50-fold reduction in the  
289 parasite burden of the footpads when infected with *BDF5::6xHA<sup>-/+flx</sup>* rapamycin treated cells  
290 compared to the *BDF5::6xHA<sup>-/+flx</sup>* DMSO treated cells or the parental strain (**Fig. 2E**). The  
291 presence of the *pNUS BDF5::GFP* episome restored parasite burden in the rapamycin-treated  
292 strain to a level not significantly different to that observed in its uninduced control (**Fig. 2E**).  
293 The median parasite burdens of the *BDF5::6xHA<sup>-/+flx</sup>* strain rapamycin-treated strain in the  
294 popliteal lymph nodes was ~10-fold lower than the control strain, but this difference was not  
295 statistically significant (**Fig. S6C**). DNA extracted from footpads and lymph nodes, including  
296 both host and amastigote DNA, was subjected to PCR analysis which detected non-excised  
297 *BDF5::6xHA<sup>-/+flx</sup>* consistent with BDF5 being essential for amastigote survival as well as  
298 promastigote survival (**Fig. S6D**). Clonal promastigote lines lacking the *BDF5::6xHA<sup>-/+flx</sup>* allele  
299 could only be derived from the populations containing an addback copy of BDF5 (**Fig. S6E**).  
300 We conclude that BDF5 is essential for successful infection of the mammalian host and is likely  
301 to be essential for amastigote survival too.

302



303 *ChIP-seq reveals BDF5 genomic distribution*

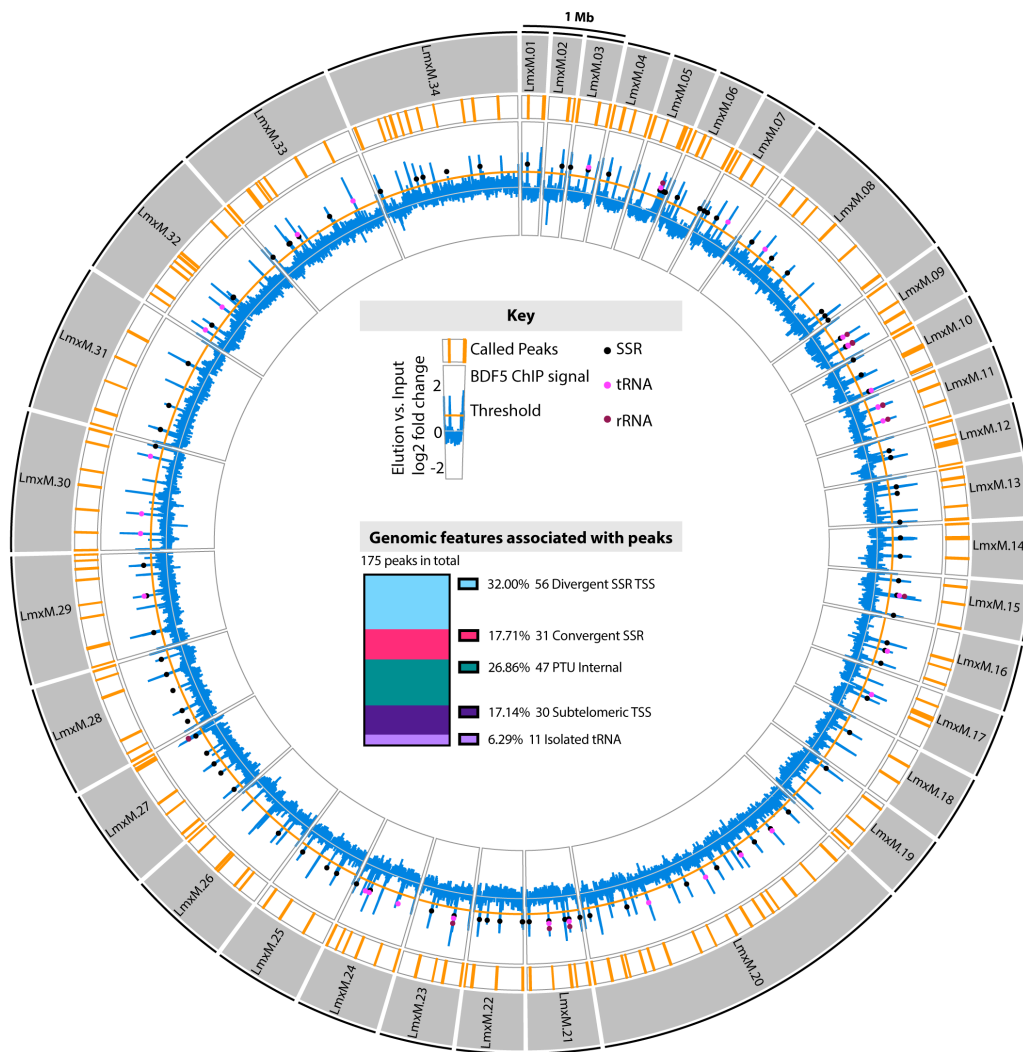

304

305

306 **Figure 3: Genome-wide distribution of BDF5 determined by ChIP-seq analysis.** Outer circles:  
307 Circos plot representing the 32 MB *L. mexicana* genome. The 34 chromosomes are depicted  
308 by grey segments. Regions enriched  $>0.5$  log<sub>2</sub>fold for BDF5 indicated by the orange bars, the  
309 enrichment of BDF5::6xHA in the elution over the input chromatin is indicated in the blue line  
310 on a log<sub>2</sub> fold scale, values are the mean derived from 3 ChIP replicates. Genomic features  
311 such as strand-switch regions, tRNA genes, and rRNA genes are indicated by coloured circles  
312 on this blue line. Inner pane: Key and stacked bar chart showing the genomic features  
313 associated with the peaks.

314

315 Due to the importance of BDF5 for the survival of *Leishmania* parasites and the demonstration  
316 that it is a nuclear protein, we sought to identify where it might be found in the context of  
317 genomic architecture. The BDF5::6xHA protein expressed by the *BDF5::6xHA*<sup>-+/flx</sup> strain was  
318 analysed by chromatin immunoprecipitation sequencing (ChIP-Seq). We identified 175  
319 regions where BDF5 was determined to be enriched on the genome; these peaks were  
320 distributed across all the 34 chromosomes and could be correlated with specific genomic  
321 features (**Fig. 3, Fig. S7A, S7B**). Of the total peaks, 56 (32%) were associated with TSSs in



322 divergent strand switch regions (dSSRs). A further 30 (17%) were in subtelomeric regions likely  
323 to be transcriptional start sites based on the orientation of the polycistronic transcription  
324 unit. Forty-seven peaks (27%) were identified in internal regions of polycistronic transcription  
325 units (PTUs) and a further 11 peaks overlapped with isolated tRNA genes (6%). Intriguingly,  
326 31 peaks (18%) were found at convergent strand switch regions, which are likely  
327 transcriptional termination sites. The size of the regions determined to be enriched for BDF5  
328 varied, with the mean of peaks found at dSSRs encompassing ~10 kb (**Fig. S7C**). The shape of  
329 BDF5 peaks over divergent strand switch regions tended to be broad and even, without  
330 exhibiting the “twin-peaks” pattern seen for histone H3 acetylation in *L. major*<sup>14</sup> (**Fig. S7A,**  
331 **S7D**). Peaks at both divergent and convergent SSRs tended to be symmetrical although they  
332 were narrower and weaker at convergent SSRs (cSSRs) (**Fig. S7D**). Peaks found in PTUs were  
333 asymmetric, rising steeply to a peak with a shallow decay in the direction of the PTU  
334 transcription. The PTU peak enrichment levels were equivalent to those at dSSRs (**Fig. S7E**).  
335 The finding that BDF5 predominantly localises to divergent SSRs and other TSSs suggests it  
336 plays a role in polymerase II transcription. However, as a number of termination sites and  
337 other classes of small RNA genes were also enriched for BDF5 this indicates it could also play  
338 a generalised role in a range of transcriptional processes. Therefore, we sought to analyse the  
339 protein complexes associated with BDF5 to give insight into its potential function.

340  
341  
342  
343  
344  
345  
346  
347  
348  
349  
350  
351  
352  
353  
354

355 *XL-BioID identifies the BDF5 proximal proteome*

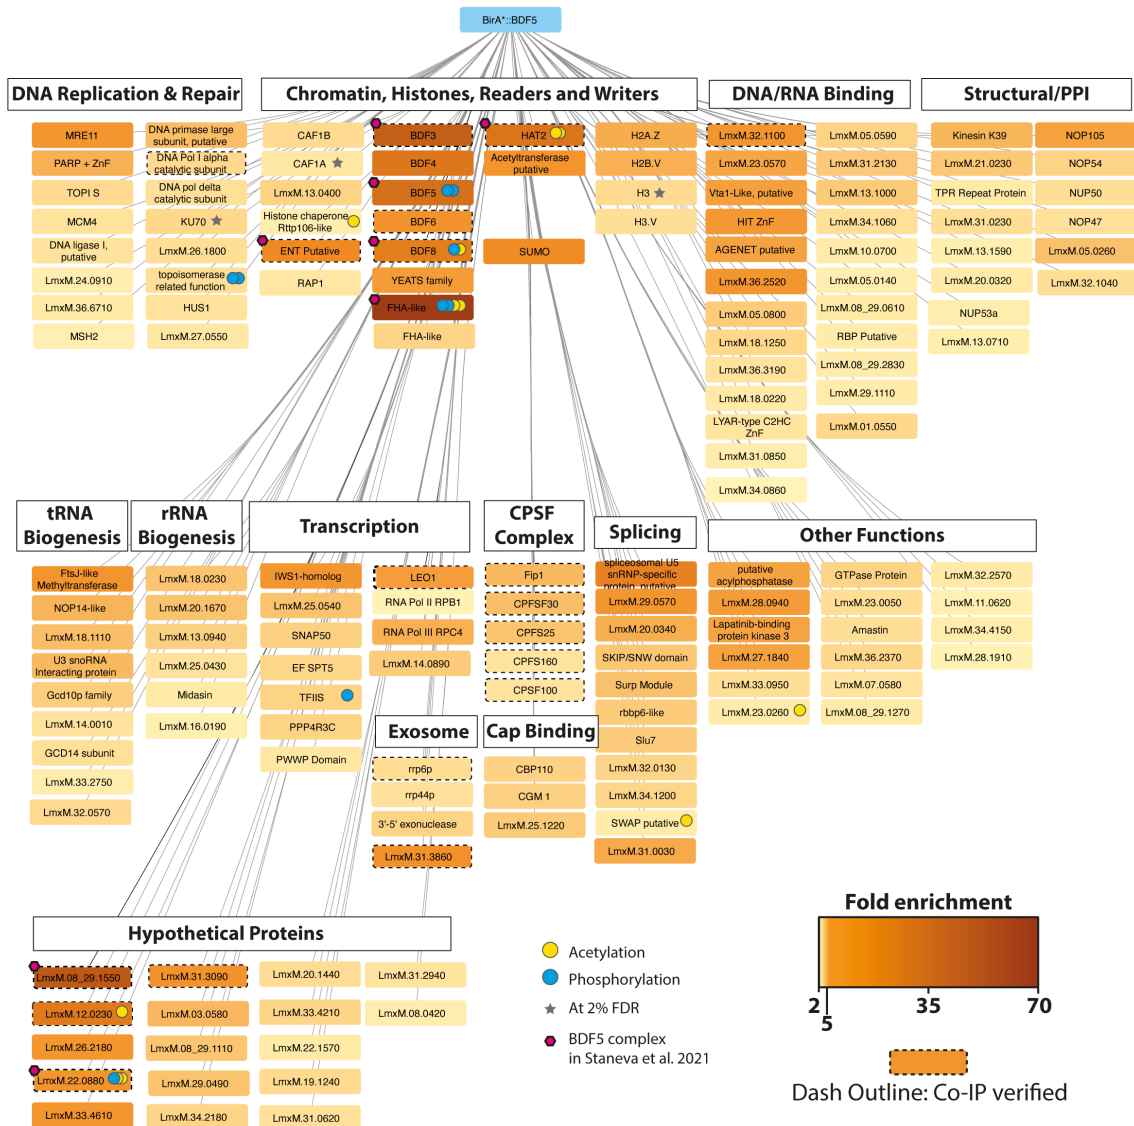

356

357 **Figure 4: The BDF5-proximal proteome determined by XL-BioID.** Network indicates proteins  
 358 determined to be spatially enriched in proximity to BirA\*::BDF5 following biotin labelling and  
 359 DSP cross-linking. Fold enrichment values are encoded in the colour intensity of the protein  
 360 boxes; these were calculated from label free protein intensities against a control expressing  
 361 KKT19::BirA\*, from 3 replicate experiments. A dashed outline to a box indicates that BDF5 co-  
 362 purified with this protein in a reciprocal co-immunoprecipitation experiment. If a post  
 363 translational modification (PTM) was detected for a protein, this is indicated using a coloured  
 364 circle. Proteins are grouped by functional annotations or previously published data of  
 365 complexes in *Leishmania* or *Trypanosoma*. Proteins represented are those identified at 1%  
 366 false-discovery rate (FDR), those marked with a grey star denote those identified at 2% FDR for  
 367 select proteins. CPSF stands for cleavage and polyadenylation specificity complex, PPI stands  
 368 for protein-protein interactions. Magenta hexagons indicate members of the BDF5, BDF3,  
 369 HAT2 complex reported in *T. brucei*.

370

371 To identify the functional properties of the environment proximal to BDF we applied an in-  
 372 situ proximity labelling technique, cross-linking BioID (XL-BioID)<sup>51</sup>. The promiscuous biotin  
 373 ligase BirA\*, which generates a locally reactive (~10 nm) biotinoyl-5'-AMP<sup>52</sup>, was fused to the

374 N-terminus of BDF5 by endogenous tagging. The resultant parasites were incubated with 150  
375  $\mu$ M biotin for 18 h to permit labelling of proteins in proximity to BirA\*::BDF5. The parasites  
376 were then treated with a limited amount of dithiobis(succinimidyl propionate) (DSP) chemical  
377 cross-linker, to increase the capture of proximal proteins which enriched with streptavidin,  
378 trypsin digested and processed for LC-MS/MS analysis. Importantly, a control cell line was  
379 treated in the same way to provide a control dataset of spatially segregated, nuclear proteins.  
380 The nuclear-localised protein kinase KKT19<sup>53</sup> was chosen as it is expressed at similar levels to  
381 BDF5 and localised to a distinct structure, the inner-kinetochore<sup>54</sup>. This provided a way to  
382 subtract common background proteins labelled during the synthesis and trafficking of BDF5  
383 to the nucleus as well as endogenously biotinylated cellular proteins. Following SAINTq  
384 interaction scoring, 156 proteins were determined to be enriched at 1% FDR (**Fig. 4, Table**  
385 **S2.**). A subset of these proteins was selected for endogenous tagging with 3xHA::mCherry in  
386 mNG::BDF5 (which also contains a 3xmyc epitope) expressing strain to allow reciprocal co-  
387 immunoprecipitation and verification of the XL-BioID dataset (**Fig. S8, Table S1**). This also  
388 served to confirm there was no co-localisation of BDF5 and KKT19, and thus it was an  
389 appropriate control protein.

390  
391 The BDF5 proximal proteins were assessed for potential function (**Fig. 4**) and assembled into  
392 a loose network. We identified a core set of 11 highly enriched proteins (>10-fold), including  
393 the bait protein BDF5. Also identified were BDF3, BDF4 and Histone Acetyltransferase 2  
394 (HAT2), along with several hypothetical proteins LmxM.35.2500, LmxM.08\_29.1550,  
395 LmxM.12.0230, LmxM.33.2300, LmxM.24.0530. A component of the spliceosome  
396 LmxM.23.0650 was also identified, as was SUMO, which is likely conjugated to proteins in the  
397 interactome (SUMO is a PTM common in the nucleus<sup>55,56</sup>). BDF5 was enriched 35-fold  
398 compared to the control samples, BDF3 was enriched 41-fold and BDF4 26-fold. HAT2 was  
399 enriched 27-fold, strongly suggesting that these proteins are in very close proximity and that  
400 they may even form a stable complex. BDF6 (8-fold) and YEATS, a non-bromodomain acetyl-  
401 lysine reader, (4.8-fold) were also identified, consistent with the chromatin environment  
402 surrounding BDF5 being important sites of regulation through acetylation. The hypothetical  
403 proteins of the interactome were assessed by Phyre2 and HHPRED for remote structural  
404 homology to known domains that might indicate their function. LmxM.35.2500 was enriched  
405 >65-fold compared to the control samples. HHpred analysis detected remote homology to  
406 forkhead-associated domains, suggesting it may play a role in the recognition of  
407 phosphorylation sites. LmxM.33.2300 was enriched 22-fold, HHPRED searching detected  
408 remote structural homology related to bromodomains in the C-terminal region. However, it  
409 appears to lack the conserved asparagine and tyrosine residues. LmxM.33.2300 may  
410 therefore represent a degenerate bromodomain, therefore we propose to name it BDF8.  
411 LmxM.24.0530, which was enriched almost 14-fold, is predicted to contain an EMSY N-  
412 Terminal Domain (ENT). EMSY is a protein implicated in DNA repair, transcription and human  
413 tumorigenesis<sup>57,58</sup>. LmxM.24.1230 was identified as 7-fold enriched, and domain searching  
414 identified a putative acetyltransferase in the N-terminal region as well as PHD-Zinc Finger

415 domain. Seventeen other enriched hypothetical proteins remained that lacked structural  
416 homology to known protein domains.

417

418 Many proteins identified in the proximal proteome at lower enrichment levels play roles in  
419 processes associated with active transcription, broadly separated into RNA transcription and  
420 processing, including pre-mRNA cleavage, polyadenylation, splicing, cap-binding and quality  
421 control (nuclear exosome), indicating that these processes are occurring in proximity to BDF5.  
422 Components of RNA polymerase complexes were identified, including RPC4 associated with  
423 RNA polymerase III, RPB1, the largest subunit of RNA polymerase II and the RNA polymerase-  
424 associated protein LEO1. LEO1 is a component of the PAF1 complex, which plays numerous  
425 roles in transcriptional regulation. The basal transcription factors SNAP50, TFIIIS-like protein  
426 (LmxM.32.2810), and a hypothetical protein (LmxM.22.0500) with remote homology to TFIIIS  
427 helical bundle, ISW1 transcriptional elongator (LmxM.22.0500) were identified. Five  
428 components of the cleavage and polyadenylation specificity complex (CPFS) were identified  
429 and validated by reciprocal co-IP, as this process occurs co-transcriptionally it must be near  
430 polymerase complexes. Additionally, proteins associated with the splicing machinery of  
431 *Leishmania* were identified, including LmxM.23.065, a component of the spliceosome. Cap  
432 binding proteins and members of the nuclear exosome were also identified, all indicative of  
433 the mRNA processing and quality control events that occur alongside transcription of the pre-  
434 mRNA. These hits are consistent with the ChIP-seq dataset and show BDF5 is located in sites  
435 of polymerase II transcriptional activity.

436

437 The ChIP-seq distribution of BDF5 identified it to be enriched not only at TSS regions but also  
438 at rRNA and tRNA genes and some polymerase II termination sites (cSSRs). It was interesting  
439 to discover proteins in the XL-BioID that are involved in the maturation of both tRNAs and  
440 rRNAs, placing BDF5 in proximity to the transcription and maturation of different classes of  
441 RNAs. Base J is associated with termination sites in *Leishmania*<sup>59</sup>, and the base J-associated  
442 glucosyltransferase JBP1 (LmxM.36.2370) was found to be 3-fold enriched over the control,  
443 potentially indicating that BDF5 may occasionally be found at sites linked to transcriptional  
444 termination. Interestingly, many factors associated with the detection and repair of DNA  
445 damage were also found in the proximal proteome, together with factors associated with  
446 DNA replication. It is known that DNA damage can occur in transcriptionally active regions  
447 due to the formation of RNA-DNA hybrids called R-loops<sup>60</sup>. Some of the origins of DNA  
448 replication in *Leishmania* coincide with transcriptional start sites, suggesting we can detect  
449 this association in the XL-BioID data<sup>61</sup>.

450

451 Because the samples were trypsin digested, it was difficult to obtain much information on  
452 histone tails. Nevertheless, we were able to detect some peptides from the core of histones  
453 and histone variants as significantly enriched in proximity to BDF5. Peptides were detected  
454 for H2A.Z, H2B.V, H3 and H3.V. In *T. brucei*, the H2A.Z and H2B.V variants have been localised  
455 to divergent SSRs<sup>19</sup>, where H2A.Z plays a role in the correct positioning of transcription

456 initiation. H2A.Z and H2B.V are also essential for *Leishmania*<sup>62</sup>. H3.V localises to convergent  
457 SSRs in *T. brucei* and is not essential for *Leishmania*, nor does it play a role in transcriptional  
458 termination in this organism<sup>62</sup>. Mining the XL-BioID data further we were able to detect a  
459 number of acetylated peptides. Acetylation sites were detected on HAT2, BDF8, FHA-like  
460 protein (LmxM.35.2500), a putative Rtt106-like histone chaperone and several hypothetical  
461 proteins (**Table S2**). However, we were again unable to detect any acetylated peptides  
462 derived from histones.

463

464 The capacity of XL-BioID to enrich large amounts of proximal material allows it to be combined  
465 with other methods, such as phosphoproteomics<sup>51</sup>. We engineered a cell line to carry  
466 BDF5::miniTurboID for faster labelling kinetics and higher temporal resolution, allowing us to  
467 explore BDF5-proximal phosphorylation events across the cell cycle of hydroxyurea  
468 synchronised cultures. Following synchronisation release, 30 minute biotinylation timepoints  
469 were carried out 0 , 4 and 8 h corresponding to G1/S, S and G2/M phase respectively..  
470 Samples were processed using the XL-BioID workflow, then proximal phosphopeptides were  
471 enriched using Ti-IMAC resin prior to LC-MS/MS analysis. The resulting dataset was compared  
472 to a reference phosphopeptide dataset derived from the kinetochore protein KKT3<sup>51</sup>. Two  
473 BDF5-proximal phosphopeptides were identified in early-S phase which then rose to 19 and  
474 13 as the cells progressed through the S and G2/M phases respectively (**Fig. S9, Table S3**). Of  
475 these, 14 unambiguous phosphosites were detected in total for proteins in proximity to BDF5,  
476 including several for BDF5 itself, pS135, pS133, pS317 and pS330. S135 and S133 are located  
477 between the two bromodomains, while S317 and S330 are located after the second  
478 bromodomain. LmxM.35.2500, which was highly enriched in the original XL-BioID and  
479 identified to contain a putative FHA domain, was itself found phosphorylated at S202, S208  
480 and S545. LmxM.33.2300 (BDF8) was found to contain an ambiguous phosphosite at one of  
481 six sites in the region of S50-S61 (**Fig. S9**). Despite detecting multiple phosphosites, only a  
482 single protein kinase was identified in proximity to BDF5, LmxM.25.1520 (LBPK3), an orphan  
483 kinase with unknown function that has been reported to bind lapatinib<sup>63</sup>.

484

485 The combined ChIP-Seq and XL-BioID data defined where BDF5 localises on the genome, and  
486 the protein landscape around it. This points towards a role for BDF5 in promoting  
487 transcriptional activity and provides a starting point to develop assays to characterise the  
488 phenotypes of BDF5-induced null strains.

489

490

491

492

493 *BDF5* depletion results in generalised transcriptional defect.

494

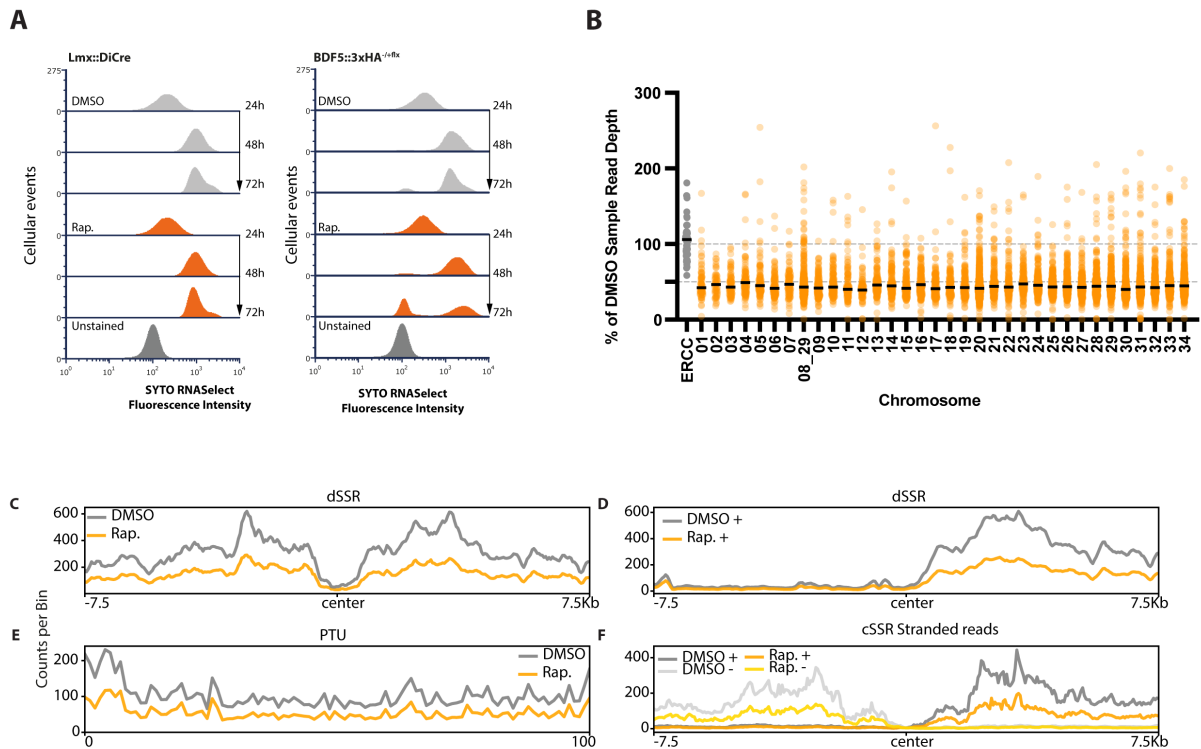

495

496 **Figure 6: Effect of BDF5 depletion on RNA levels and gene expression.** **A.** Flow cytometry of  
 497 cells stained with SYTO RNaselect Stain to measure total RNA levels in *Lmx DiCre* strains or the  
 498 *BDF5*<sup>-/+flx</sup> strain treated with rapamycin or DMSO over a 72 h time course. 20,000 events  
 499 measured per condition. **B.** Dot plot of total RNA-seq reads per protein-coding gene scaled to  
 500 ERCC spike-in controls, then as a percentage of the DMSO control sample, separated per  
 501 chromosome, conducted at a 96 h timepoint. Black lines denote the median. N=3 **C.** Metaplot  
 502 divergent SSR (n=60) for DMSO treated or rapamycin-treated *BDF5*<sup>-/+flx</sup>. **D.** Metaplot of reads  
 503 mapping to the + strand, normalised to ERCC control at divergent SSRs (n=60) of DMSO treated  
 504 or rapamycin-treated *BDF5*<sup>-/+flx</sup> cultures. **E.** Metaplot of + stranded RNA-seq reads normalised  
 505 to ERCC spike-in controls for PTUs (n=120), on a scale of 0-100%. **F.** Metaplot of reads mapping  
 506 to the + and - strands, normalised to ERCC control at convergent SSRs (n=40) of DMSO treated  
 507 or rapamycin-treated *BDF5*<sup>-/+flx</sup> cultures. Metaplot data is from 1 representative of the three  
 508 replicate RNA-seq datasets.

509

510

511 As most of the BDF5 enriched regions of the genome corresponded to transcriptional start  
 512 sites, and the proximal proteome contained factors associated with the transcription and  
 513 maturation of various classes of RNA we sought to assess the effect of BDF5 depletion on  
 514 cellular RNA levels. Promastigote cultures were stained for total RNA content using SYTO  
 515 RNaselect fluorescent stain at 24, 48 and 72 h timepoints and measured by flow cytometry  
 516 (**Fig. 6A**). For *Lmx::DiCre* strain, the addition of rapamycin caused no changes in the levels of  
 517 total RNA staining. SYTO RNaselect staining increased as cells progressed through log phases  
 518 of growth at 48-72 h time points. However, once BDF5 was deleted from the *BDF5::6xHA*<sup>-/+flx</sup>



519 cell line by the addition of rapamycin, there was a pronounced increase in the number of  
520 cellular events containing very low levels of RNA staining, such that the profile at 72 h overlaps  
521 with that for with unstained control cells. This result suggested that total levels of  
522 transcription were reduced upon BDF5 deletion from cells. We investigated this in more detail  
523 by using total, stranded RNAseq that included External RNA Controls Consortium (ERCC)  
524 Spike-in controls<sup>20</sup>. Cultures of *BDF5::6xHA*<sup>-/+flx</sup> treated with Rapamycin or DMSO were  
525 harvested, then RNA extraction buffer spiked with the 92 synthetic ERCC RNAs was used to  
526 lyse the parasites for RNA purification. Following sequencing and read mapping these RNAs  
527 were then used to provide a normalisation channel. Overall, a >50% reduction in the median  
528 read depth was observed across protein-coding genes on all chromosomes (**Fig. 6B**). When  
529 normalised read depths were compared using metaplots of divergent SSRs, this ~50%  
530 reduction in transcriptional levels was reflected (**Fig. 6C**). However, no positional effects were  
531 observed on transcriptional start sites (**Fig. 6D**). The 50% reduction in read depth was  
532 reflected across PTUs (**Fig. 6E**) and at convergent SSRs (**Fig. 6F**). Strand-specific read depth at  
533 cSSRs did not indicate any increase in transcriptional readthrough in BDF5-induced null cells  
534 (**Fig. 6F**), suggesting the BDF5 located at these termination sites is not playing a role in  
535 transcriptional termination. Overall, these results indicate BDF5 is important for global pol II-  
536 dependent gene transcription.

537  
538 Transcriptionally active regions of kinetoplastid genomes often accumulate DNA damage  
539 which occurs due to the formation of DNA-RNA hybrids (R-loops)<sup>60,64</sup>. As we detected proteins  
540 involved in co-ordinating DNA repair in the BDF5 proximal proteome, and that this appears  
541 to be a broader feature of BDF protein networks<sup>65,66</sup>, we examined if there was a link between  
542 BDF5 and the DNA damage response in *Leishmania*. BDF5-induced-null promastigotes cease  
543 growing quickly, whereas parasites deficient for genome-stability factors often die slowly<sup>50</sup>,  
544 suggesting maintaining genome integrity is not the primary role of BDF5. Indeed, after using  
545 western blotting to detect  $\gamma$ H2A phosphorylation<sup>67</sup>, a sensitive marker for the cellular  
546 response to DNA damage, we could not detect any increase in  $\gamma$ H2A signal in BDF5-depleted  
547 cells, nor was there any detectable difference in the  $\gamma$ H2A response of these cells to a non-  
548 specific DNA damaging agent, phleomycin (**Fig. S10**). This indicates that there is no direct or  
549 secondary role for BDF5 in DNA damage response. Despite enrichment in the BDF5 proximal  
550 proteome for mRNA splicing factors, we did not find evidence to support trans- or cis-splicing  
551 defects in BDF5 induced-null mutants using a qualitative RT-PCR assay. This assay was capable  
552 of detecting splicing defects caused by inhibition of an analog-sensitised CRK9 by the bulky  
553 kinase inhibitor 1NM-PP1(**Fig. S11, S12**)<sup>68</sup>.

554

## 555 Discussion

556 Kinetoplastid parasites have evolved a genomic architecture that requires them to conduct  
557 most gene transcription constitutively, in an apparently simplified manner and deal with  
558 consequences of this using post-transcriptional regulation and specialised solutions to genes  
559 requiring a “high-dose”<sup>8</sup>. Pol II transcriptional start sites may simply be maintained as open

560 chromatin. However, recent evidence has indicated these regions are actively regulated,  
561 particularly through histone acetylation. How the cell interprets these marks is not completely  
562 understood. Bromodomains are clearly critical components of this process in *Leishmania*; we  
563 were unable to generate null mutants in five of the seven bromodomain encoding genes, also  
564 implying there is no redundancy in their individual functions. Although failure to generate a  
565 null is the most basic standard of genetic evidence for essential genes<sup>44</sup>, we were able to  
566 generate high-quality, genetic target validation for BDF5, using inducible DiCre both in the  
567 promastigote stage and during murine infections. BDF5 expression was confirmed in both  
568 stages and expression levels were correlated with cellular growth rate in promastigote stages.  
569 Combined with the rapid cytostatic phenotype occurring upon BDF5 inducible deletion,  
570 followed by cell death, this identifies BDF5 as a regulator of cell growth and survival. This  
571 finding demonstrates that the interpretation of histone acetylation is important for cellular  
572 survival (**Fig. 7**), although for *Leishmania* the specific histone PTMs found at TSSs are not  
573 currently defined.

574  
575 When functionally characterising BDF5, our starting hypothesis was that BDF5 would localise  
576 to polymerase II transcriptional start sites, so it was surprising to find BDF5-enriched peaks  
577 associating with many other sites such as rRNA genes, tRNA genes and convergent strand  
578 switch regions. This suggests BDF5 plays a multipurpose or generalist role in recruiting or  
579 regulating chromatin to promote transcription by multiple polymerase complexes. This was  
580 further emphasised by the proximity proteomics dataset, which revealed BDF5 to be close to  
581 proteins involved in different processes linked to transcriptionally active chromatin, in  
582 particular RNA maturation factors, DNA repair factors and polymerase associated complexes.  
583 Our phenotypic analysis appeared to rule out roles for BDF5 in influencing the DNA damage  
584 response and cis- and trans-splicing of mRNA but did demonstrate that it was required for  
585 normal transcription of polymerase II PTUs. Due to the rRNA depletion method used and low  
586 coverage over tRNA genes, we could not assess if pol I or pol III transcripts levels were  
587 reduced. This could be determined using qPCR in future studies. Spike-in controlled total RNA  
588 seq was previously used to study the influence of HAT1 and HAT2 on transcription in *T. brucei*  
589 <sup>20</sup>. It is striking that BDF5 knockout in *L. mexicana* phenocopies HAT1 knockdown in *T. brucei*,  
590 both resulting in an overall reduction in transcription levels. In *T. brucei*, HAT1 is required for  
591 acetylation of H2A.Z and H2B.V. Depletion of HAT1, and thus H2A.Z levels, leads to a 10-fold  
592 decrease in the amount of chromatin-bound pol II, resulting in 50% reduced transcriptional  
593 activity. Intriguingly, pol II levels at TSSs were not affected by this; the authors suggested  
594 H2A.Z acetylation is required for optimal transcription of bound pol II. As BDF5 knockout  
595 phenocopies HAT1 depletion and results in lower pol II activity, it might therefore be involved  
596 in reading or applying acetylation of H2A.Z. Surprisingly, although we find HAT2 proximal to  
597 BDF5, HAT1 was neither enriched nor detected in our XL-BioID dataset. This suggests that  
598 there is a distinct spatial separation between BDF5, HAT2 and HAT1 in *Leishmania* (assuming  
599 there is no technical reason HAT1 cannot be labelled by XL-BioID). BDF5 also did not co-  
600 precipitate very strongly with HAT2 (**Fig. S8**), suggesting any interaction between them might

601 be transient or indirect. We did not observe changes in the positioning of transcription  
602 initiation, suggesting the HAT1/BDF5 phenotype over-rides any effect on HAT2 dysfunction if  
603 this is indeed a BDF5 complex member. Purified *L. donovani* HAT2 has been shown to  
604 acetylate H4K10 and it appears to be essential as only heterozygotes can be generated using  
605 traditional knockout strategies<sup>15,18,69</sup>. *L. donovani* HAT2<sup>-/+</sup> heterozygotes grow slowly and  
606 display a cell-cycle defect. No effect was determined on transcriptional initiation positioning  
607 at TSSs but an S-phase cell cycle-dependent reduction on *CYC4* and *CYC9* genes was  
608 reported<sup>18</sup>. Future work could investigate the requirement of BDF5 for cell cycle dependent  
609 gene transcription in *Leishmania*, which is an interesting observation given the lack of obvious  
610 gene specific promoters.

611  
612 A recent immunoprecipitation dataset of *T. brucei* chromatin factors<sup>22</sup> defined a complex  
613 consisting of BDF5, BDF3, HAT2 and orthologs of the hypothetical genes LmxM.24.0530,  
614 LmxM.22.0880, LmxM.35.2500, LmxM.33.2300, LmxM.08\_29.1550 that were highly enriched  
615 in our proximity proteome (**Fig. 4**). We propose that these proteins represent a Conserved  
616 Kinetoplastid Regulator of Transcription (CRKT) Complex, that is recruited to acetylated  
617 histones at TSSs (**Fig. 7**). The association of BDF5 at transcriptional termination regions, albeit  
618 in lower amounts, could indicate that BDF5 is included in a mobile complex that can progress  
619 along chromatin and accumulates at start and termination sites. One complex could be the  
620 PAF1 complex, a multifunctional complex associated with pol II initiation, elongation, pausing  
621 and termination<sup>70</sup>. However, PAF1-complex is poorly characterised in kinetoplastids and the  
622 PAF1 protein itself lacks identifiable orthologs in these organisms. *T. brucei* BDF5 has been  
623 suggested as a potential component of a transcription initiation complex due to its dual  
624 bromodomains and the interaction with proteins containing homology to TFIID TAF1 (which  
625 also contains 2 bromodomains as well as protein kinase and acetyltransferase function).

626  
627 Our findings further illustrate the strength of proteomic approaches to studying chromatin  
628 regulation in kinetoplastids where the large TSSs allow plentiful material to be derived<sup>20</sup>.  
629 Combined with XL-BioID this allowed for the enrichment of PTMs to be determined for many  
630 of the complex members. The phosphorylation of the region connecting the two BDs might  
631 represent a site of PTM-dependent regulation of BDF5. Regulation of BDF function by  
632 phosphorylation has been reported, for example, BRD4 is phosphorylated in mitosis and  
633 hyperphosphorylated BRD4 is associated with greater transcriptional activity during  
634 oncogenesis<sup>71,72</sup>. Adaptation of the XL-BioID workflow to include a chemical derivatisation  
635 step (e.g. stable isotope acylation) could allow it to be used to detect histone tail peptides in  
636 proximity to BDF5 or other BDFs, potentially identifying their native binding partners and  
637 providing locus-specific views of histone PTMs.

638  
639 As bromodomains are chemically tractable targets it may be possible to develop *Leishmania*  
640 specific inhibitors that target BDF5. Such a compound would be of high value to the  
641 investigation of BDF-dependent transcriptional regulation in kinetoplastids, allowing for

642 precise temporal disruption of BDF5 and the processes that it coordinates. It should be noted  
643 that parasites expressing BDF5 with singly mutated bromodomains were viable, requiring  
644 both to be disrupted to observe a reduction in parasite growth. Potential BDF5 inhibitors  
645 would likely require a bi-specific molecule, a PROTAC (proteolysis targeting chimera) molecule  
646 (not yet realised in kinetoplastids), or a mono-specific inhibitor that can perturb the complex  
647 enough to be fatal for the cell.

648

649 In summary, our findings identify the importance of the linkage between histone acetylation  
650 and transcriptional regulation by bromodomain factors in a eukaryote that is divergent from  
651 opisthokonts such as the humans host. Because of their unusual features, kinetoplastids can  
652 provide ideal organisms to investigate the evolution of chromatin regulation by acetylation.

653

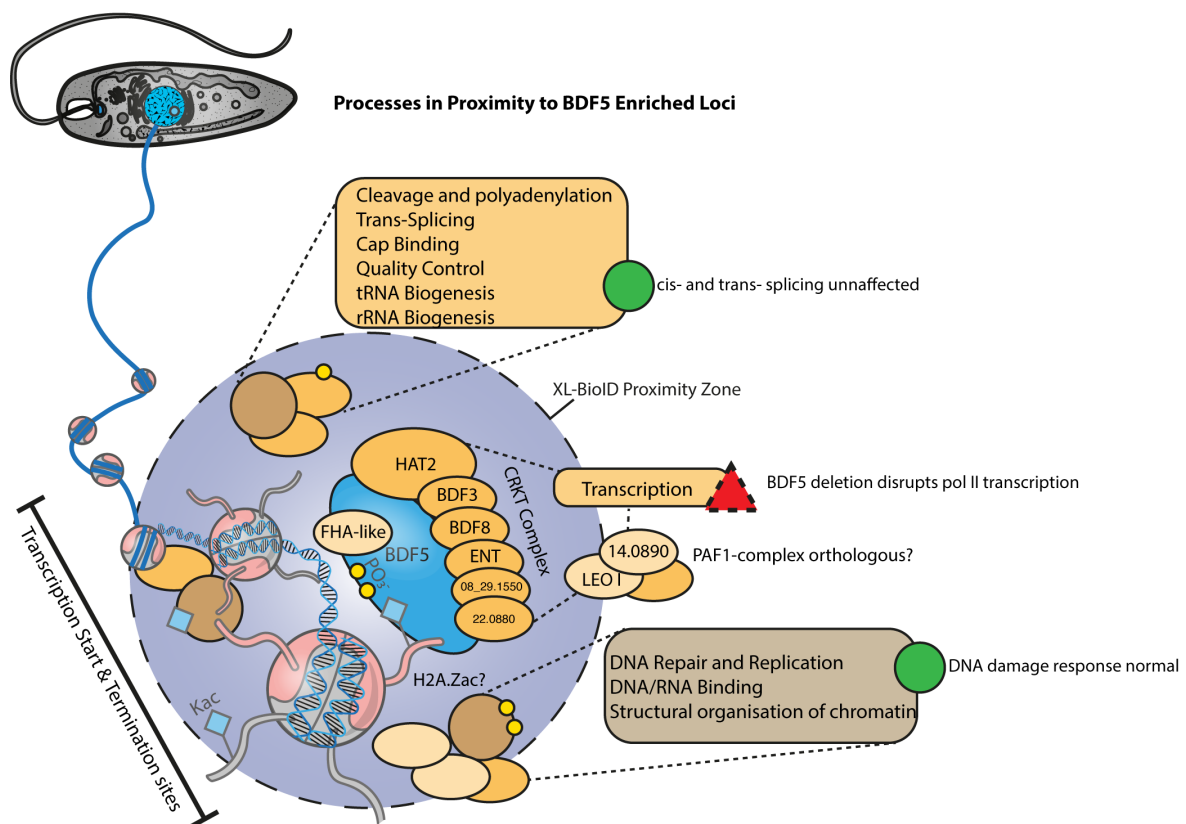

654

655 **Figure 7: Cartoon of the BDF5-defined chromatin landscape.** BDF5 localised to chromatin with  
656 the CR1 complex members depicted as interacting directly and influencing transcription.  
657 Juxtaposition of complex members is for illustration only. Not to scale.

658

### 659 **Acknowledgements**

660 This work was supported by funding from GSK through the Pipeline Futures Group and a  
661 Fellowship from a Research Council United Kingdom Grand Challenges Research Funder  
662 under grant agreement 'A Global Network for Neglected Tropical Diseases' grant number  
663 MR/P027989/1. to Nathaniel Jones. This work was part-funded by the Wellcome Trust [ref:

664 204829] through the Centre for Future Health (CFH) at the University of York. Elmarie  
665 Myburgh, University of York, assisted with lymph-node dissection and parasite burden assays.  
666 We thank our colleagues in The Bioscience Technology Facility of the University of York, who  
667 provided expertise and technical support that assisted this work, and Robert Kirkpatrick  
668 (former GSK employee) for his critical input to develop the collaboration between University  
669 of York and GSK.

670

671

## 672 **Author Contributions**

673 NGJ, FC, AJW and JCM conceived the project. JCM, AJW, RG, JM and FC supervised the  
674 project. NGJ and JCM designed the experiments. NGJ, VG, GM and JBTC performed the  
675 experiments. NGJ, VG, GM and KN analysed experimental data. NGJ wrote the manuscript  
676 and all other authors revised it. NGJ, RP, IR, FC, AJW and JCM acquired funding.

677

## 678 **Data Availability**

679 Mass spectrometry data sets and proteomic identifications are available to download from  
680 MassIVE (MSV000087750), [doi:10.25345/C5G543] and ProteomeXchange (PXD027080).

681 ChIP-Seq and RNA-Seq reads are available as FASTQ files at the European Nucleotide Archive  
682 under the accession code PRJEB46800.

683

## 684 **Supplemental Files**

685

686 Table S1: Excel spreadsheet, List of Oligonucleotides, plasmids, cell lines and antibodies  
687 used in this study.

688

689 Table S2: Excel spreadsheet, SAINTq Analysis of BDF5 XL-BioID data to identify proximal  
690 proteins, also contains list of remote homology identified in hypothetical proteins by  
691 HHPRED analysis.

692

693 Table S3: Excel spreadsheet, BDF5 proximal phosphosites through the cell cycle as  
694 determined by limma analysis of phosphoproteomic XL-BioID samples.

695

## 696 **Methods**

697

### 698 *Molecular Biology*

699 Computational sequence analysis, design of vectors, primers and PCR fragments was  
700 performed using CLC Main Workbench (Qiagen). Oligonucleotides were synthesised by  
701 Eurofins Genomics. High-fidelity PCRs were conducted using Q5 DNA polymerase (NEB)  
702 according to manufacturer's instructions. Low-fidelity screening PCRs were conducted using  
703 Ultra Mix Red (PCR Biosystems) according to manufacturer's instructions. Vectors for DiCre  
704 strain generation were generated as previously described<sup>45</sup> using Gateway Assembly (Thermo  
705 Fisher). PCR amplicons were resolved in 1% agarose (Melford) TBE gels containing 1x SYBRsafe  
706 and visualised on a Chemidoc MP (BioRad). A full list of oligonucleotides and vectors are  
707 presented in **Table S1**. Sanger sequencing to verify plasmids etc. was conducted by Eurofins  
708 Genomics.

709

710 Protein samples of cells were generated by taking  $2.5 \times 10^7$  log phase promastigotes, lysing in  
711 40  $\mu$ l LDS (lithium dodecyl sulfate) sample buffer supplemented to 250 mM DTT and heated  
712 to 60 °C for 10 minutes, after cooling, 1  $\mu$ l of Basemuncher (Abcam) was added and the sample  
713 incubated at 37 °C to degrade DNA and RNA. Samples were separated in TGX Stain-Free SDS-  
714 PAGE Gels (BioRad) and the total protein labelled and visualised using a propriety trihalo  
715 compound activated by UV light in a BioRad ChemiDoc MP. Western blotting was performed  
716 using an iBlot II (Invitrogen) and the associated PVDF cassettes, using program P0.  
717 Membranes were blocked with 5% milk protein in 1x Tris Buffered Saline Tween-20 0.05%.  
718 Primary and secondary antibodies are listed in **Table S1** and were detected using appropriate  
719 fluorescent channels of chemiluminescent channels of a Chemidoc MP (BioRad), using Clarity  
720 Max Western ECL Substrate (BioRad).

721

### 722 *Parasites*

723 *Leishmania mexicana* (MNYC/BZ/62/M379) derived strains were grown at 25°C in HOMEM  
724 (Gibco) supplemented with 10% (v/v) heat-inactivated foetal calf serum (HIFCS) (Gibco) and  
725 1% (v/v) Penicillin/Streptomycin solution (Sigma-Aldrich). Where required parasites were  
726 grown with selective antibiotics at the following concentrations: G418 (Neomycin) at 50  $\mu$ gml<sup>-1</sup>;  
727 Hygromycin at 50  $\mu$ g ml<sup>-1</sup>; Blasticidin S at 10  $\mu$ g ml<sup>-1</sup>; Puromycin at 30  $\mu$ g ml<sup>-1</sup> (antibiotics  
728 from InvivoGen).

729

### 730 *CRISPR/Cas9*

731 Initial screening for bromodomain gene essentiality was performed with a modification of the  
732 approach developed by the Gluenz lab<sup>42</sup>. Per gene a single sgRNA was designed with EuPaGDT  
733 <sup>73</sup> to target the interior of the coding DNA sequence. Oligonucleotides are defined in **Table**  
734 **S1**. Thirty residue homology flanks were identified adjacent to the CDS and appended to  
735 oligonucleotides designed to amplify drug resistance markers from blasticidin and neomycin  
736 drug resistance plasmids pGL2208 and pGL2663 respectively. After amplification of the sgRNA



737 and resistance marker the PCR mixes were pooled and precipitated using standard ethanol  
738 precipitation, resuspended in sterile water and added to a transfection mix with  $1 \times 10^7$  mid-  
739 log promastigotes. The cell line used was *L. mexicana* T7/Cas9::HYG::SAT<sup>42</sup>. Transfection was  
740 performed with an Amaxa Nucleofector 4D using program FI-115 and the Unstimulated  
741 Human T-Cell Kit. The mix was resuspended in 10 ml HOMEM 20% FCS and immediately split  
742 in two 5 ml aliquots. Following 6-18 h of recovery time the parasites were plated at 1:5, 1:50  
743 and 1:500 dilutions in media containing the selective drug blasticidin or G418. Endogenous  
744 tagging was performed using the pPLOT 3xMYC::mNG BSD donor vector to install N-terminal  
745 tags to BDF5, preserving the 3' UTR for native mRNA regulation (Oligonucleotides defined in  
746 **Table S1**).

747

#### 748 *DiCre*

749 DiCre strains for BDF5 were generated as previously described<sup>46</sup>. Briefly the BDF5 CDS and  
750 flanking regions were assembled into floxing or knockout plasmids using Gateway cloning,  
751 BDF5 was cloned into pGL2314 to fuse a 6xHA C-terminal tag and flank with loxP sites  
752 (**Oligonucleotides defined in Table S1**). The BDF5::6xHA<sup>flx</sup> was first integrated into parasites  
753 with clones being assessed for correct integration, correct genome copy number and  
754 inducibility of the excision of BDF5<sup>flx</sup> gene prior to the second round of transfections to delete  
755 the remaining wild-type allele. The same quality controls were performed when selecting final  
756 clones with the genotype *Leishmania mexicana* DiCre::Puro  $\Delta bdf5::HYG$   
757  $::BDF5::6xHA::flx::BSD$ .

758

759 Inducible deletion of BDF5<sup>flx</sup> in DiCre cell lines was initiated by the addition of 300 nM  
760 rapamycin (Abcam) to promastigotes cultures at  $2 \times 10^5$  cells ml<sup>-1</sup>. Cells were grown for 48 h  
761 then passaged into new media at a concentration of  $2 \times 10^5$  cells ml<sup>-1</sup>; induction was  
762 maintained by the addition of 100 nM of rapamycin to suppress escape mutants.

763

#### 764 *Clonogenic assays*

765 For clonogenic assays, mid-log cells were counted and then diluted to 1 cell per 800  $\mu$ l and  
766 plated out into 200  $\mu$ l volumes in 3 x 96-well plates to yield approximately 100 clones. Cells  
767 were plated in media  $\pm$  100 nM rapamycin and incubated at 25°C for 3 w before counting of  
768 viable colonies by both visual screening and microscopic analysis

769

770

#### 771 *Addback strains*

772 To generate episomal addbacks the BDF5 CDS was amplified from *L. mexicana* genomic DNA  
773 and cloned into the pNUS C-Ter GFP NEO (pGL1132) using HiFi Assembly (NEB) to generate a  
774 complementation vector. This was used as a base for site-directed mutagenesis using the Q5  
775 Mutagenesis product (NEB) to generate mutations in the conserved asparagine residues N90  
776 (OL9577 and OL10352), N257 (OL9579 and OL10353) to phenylalanine in BDF5 BD5.1 and

777 BD5.2 (**Table S1**). Log-phase promastigotes were transfected with 2-5 µg plasmid DNA as  
778 previously described and maintained as population under G418 selection.

779

#### 780 *Inducible overexpression*

781 An adaptation of a published method was performed whereby BDF5::GFP alleles generated  
782 for episomal addback were amplified using PCR primers OL11307 and OL11308, where the  
783 oligonucleotide included a directional loxP site as well as a homology region for HiFi Assembly  
784 into pRIB Neo (pGL1132). The vector backbone was linearised with PacI/PmeI double digest,  
785 separated by agarose gel electrophoresis and purified using QiaEx II gel extraction resin  
786 (Qiagen). Log-phase promastigotes were transfected with 1-5 µg and cloned by limiting  
787 dilution. Clones were induced to express BDF5::GFP or BDF5<sup>NN>FF</sup>::GFP

788

#### 789 *Mouse infections*

790 All experiments were conducted according to the Animals (Scientific Procedures) Act of 1986,  
791 United Kingdom, and had approval from the University of York Animal Welfare and Ethical  
792 Review Body (AWERB) committee. All animal studies were ethically reviewed and carried out  
793 in accordance with Animals (Scientific Procedures) Act 1986 and the GSK Policy on the Care,  
794 Welfare and Treatment of Animals. Mid-log parasites were treated with 500 nM rapamycin  
795 and allowed to progress to stationary phase. These cultures were used to infect BALB/C mice  
796 at a dose of  $2 \times 10^5$  parasites per footpad. Infections were allowed to progress for 8 w, at  
797 which point mice were euthanised and footpads and popliteal lymph-nodes were dissected  
798 for mechanical disruption and determination of parasite burden by limiting dilution, as  
799 previously described<sup>74</sup>.

800

#### 801 *Live-Cell Microscopy*

802 To image mNeonGreen::BDF5  $10^6$  mid-log cells were incubated with  $1 \mu\text{g ml}^{-1}$  Hoechst 3342  
803 for 20 mins at 25°C to stain DNA, harvested by centrifugation at 1200 x g for 10 mins and  
804 washed twice with PBS. Cell pellets were resuspended in 40 µl CyGel (BioStatus) and 10 µl  
805 settled onto SuperFrost+ Slides (Thermo) then cover slip applied. Cells were imaged using a  
806 Zeiss AxioObserver Inverted Microscope equipped with Colibri 7 narrow-band LED system and  
807 white LED for epifluorescent and white light imaging. Cells were imaged using the x63 or x100  
808 oil immersion DIC II Plan Apochromat objectives. Hoechst signal was imaged using the 385  
809 nm LED and filter set 49, mNeonGreen with the 469 nm LED and filter set 38. Z-stacks were  
810 obtained using the Zen Blue software to control the system and exported as .CZI files to be  
811 processed in ImageJ using the Microvolution blind deconvolution module. Wavelength  
812 parameters were set for Hoechst (497 nm) and mNeonGreen (517 nm) emission and  
813 refractive index parameters were defined for Cygel (1.37). Blind deconvolution was iterated  
814 100 times using the scalar setting. Maximum intensity projections were then exported as  
815 were individual Z-planes for subpanels in TIFF format. Amastigotes in murine bone marrow  
816 derived macrophages were grown on glass bottomed 35 mm dishes (Thermo Scientific) and  
817 imaged in FluoroBrite DMEM (Gibco) using a heated plate holder to maintain the samples at

818 35°C. In this instance due to the short imaging duration CO<sub>2</sub> supplementation was not  
819 provided.

#### 820 *XL-BioID*

821 BDF5 and KKT19 were N-terminally tagged with BirA\*<sup>42</sup> and then cultures were grown to mid-  
822 log phase. For the final 18h of growth biotin was added to the medium at 150 µM, 4 x 10<sup>8</sup>  
823 parasites were washed twice in PBS and limiting cross-linking was performed with 1 mM  
824 dithiobis(succinimidyl propionate) (DSP) for 10mins at 26 °C in PBS. After quenching with  
825 20mM Tris pH 7.5 for 5mins, cell pellets were washed in PBS and then lysed in RIPA buffer  
826 supplemented with protease inhibitors followed by Benzonase treatment and sonication.  
827 Biotinylated and cross-linked proteins were purified using Streptavidin magnetic beads  
828 (MagResyn) which were washed with a series of harsh washes before cross-linker reversion  
829 and on bead digest with Trypsin Lys-C (Promega). Peptides were then desalted and prepared  
830 for mass spectrometry. For a full protocol see *Geoghegan et al.*<sup>51</sup>

831

832 Hypothetical proteins were screened for remote structural homology using HHPRED<sup>31</sup> and  
833 Phyre2<sup>75</sup> to identify putative domains in these proteins.

834

#### 835 *Co-Immunoprecipitation*

836 Co-immunoprecipitation to confirm BioID hits was performed by tagging candidate proteins  
837 with 3xHA::mCherry PURO using an adapted pPLOT vector (gifted by Ewan Parry, Walrad Lab.)  
838 in the *L. mexicana* T7/Cas9 3xMYC::mNG::BDF5 strain previously generated. Correct  
839 integration of the tag was confirmed by western blotting for the HA epitope. For pulldowns,  
840 30 ml of mid-log cultures (~1.5 x 10<sup>8</sup> cells) were harvested, by centrifugation at 1200 x g for  
841 10 minutes and resuspended in PBS. DSP reversible cross-linker (dithiobis(succinimidyl  
842 propionate) (Thermo) was added to 1 mM and incubated for 10 mins at 26 °C. Cross-linking  
843 was quenched by the addition of Tris pH7.5 to 20 mM and parasites washed with PBS. The  
844 cells were then lysed using 1x RIPA buffer (Thermo) supplemented with 3x HALT Protease  
845 inhibitors (Thermo) and 1 x PhosSTOP (Roche), 2 µl (500 Units) BaseMuncher Endonuclease  
846 (Abcam). The lysate was sonicated 3 x 10 seconds at 40% amplitude using a probe sonicator  
847 (Sonics Vibra-Cell) and then clarified by centrifugation 10, 000 x g for 10 mins at 4 °C. HA-  
848 tagged bait proteins were then immunoprecipitated by the addition of 30 µl anti-HA magnetic  
849 beads (Pierce) incubated for 2 hours with rotation at 4 °C. The beads were then washed 3  
850 times using the supplemented RIPA lysis buffer and proteins eluted from the beads using 40  
851 µl 1x LDS buffer supplemented with 250 mM DTT and heating to 60°C for 10 mins. The eluted  
852 fractions were analysed for presence of the BDF5 prey protein and intended bait proteins by  
853 western blotting for the MYC and HA epitopes respectively.

854

#### 855 *ChIP-Seq*

856 BDF5 ChIP-seq was performed using a modification of a protocol previously optimised for *T.*  
857 *brucei*<sup>60</sup> and the ChIP-it Express Enzymatic Kit (Active Motif). *Lmx DiCre BDF5::6xHA<sup>-/+flx</sup>*  
858 parasites were grown to 5 x 10<sup>6</sup> cells ml<sup>-1</sup> in sufficient volume to collect 3 x 10<sup>8</sup> cells per ChIP

859 replicate. Cells were fixed with 1% formaldehyde for 5 mins then quenched with 1x of the  
860 included glycine solution. Fixed cells were Dounce homogenised until only nuclei were visible  
861 by microscopy. Following enzymatic digestion of purified nuclei, the mix was sonicated 3 x 10  
862 seconds at 40% amplitude using a probe sonicator (Sonics Vibra-Cell) to increase recovery of  
863 mono- to tetra-nucleosomes<sup>54</sup>. Chromatin fractionation and release was checked by agarose  
864 gel electrophoresis before immunoprecipitation using anti-HA magnetic beads (Thermo) for  
865 2 h at 4 °C. Beads were washed and the cross-linking was reversed following manufacturer's  
866 instructions. Liberated DNA and the retained input samples were purified and concentrated  
867 using ChIP-cleanup mini-columns (Zymogen). This DNA was quantified using a Qubit (Qiagen)  
868 High Sensitivity DNA kit and sent for library preparation. Library generation was performed  
869 on a minimum of 5 ng DNA using (TF KIT) in the Genomics Laboratory of University of York  
870 Bioscience Technology Facility. Sequencing was conducted at the University of Leeds. Reads  
871 were quality checked and trimmed using FastQC version 11.0.5 and Cutadapt version 2.5,  
872 respectively. This was followed by alignment to the *L. mexicana* T7/Cas9 genome using BWA-  
873 MEM (version 0.7.17). Paired ChIP-seq and input alignment files were normalised to each  
874 other using deepTools' bamCompare (version 3.3.1) with SES normalisation and bin size of  
875 500. Bigwig files were converted to wig files with UCSC's bigWigToWig tool, and the resulting  
876 3 files were combined by taking the mean. Peaks were filtered to only include those with a  
877 mean log<sub>2</sub> ratio greater than 0.5 and peaks that were less than 5 kb apart were merged.  
878 Strand switch regions were defined as regions between the end of a CDS on one strand and  
879 the beginning of CDS on the other strand. Data were visualised using IGV (Broad Institute) and  
880 Circa software (OMGenomics).

881

#### 882 *Flow cytometry*

883 Flow cytometry of fixed and live cells treated with propidium iodide for cell cycle and  
884 live/dead analysis was conducted as previously reported<sup>46</sup>. For determination of total RNA  
885 levels by SYTO RNASelect staining, 1 ml of culture was treated with 500 nM SYTO RNASelect  
886 for 20 mins at 25 °C. Cells were collected by centrifugation 1200 x *g* for 10 mins and washed  
887 with PBS before resuspension in PBS 10 mM EDTA pH 7.4. Cells were analysed using a  
888 Beckman Coulter Cyan ADP flow cytometer with detection of the stained RNA in the FL1  
889 channel.

890

#### 891 *Stranded ERCC Controlled RNA-seq*

892 Cultures of promastigote *Lmx DiCre BDF5::6xHA<sup>-/+flx</sup>* were treated with DMSO or 300 nM  
893 rapamycin for 48 h then passaged to a density of 2 x 10<sup>5</sup> cells ml<sup>-1</sup> for another 48 h. At this  
894 point 2 x 10<sup>7</sup> cells were collected, washed in PBS and processed for total RNA extraction. Total  
895 RNA was extracted using Monarch Total RNA Miniprep kit (NEB) as per the manufacturer's  
896 instructions with the exception of the addition of ERCC Synthetic RNA Transcripts (Ambion)  
897 to the RNA extraction buffer used to lyse the cells. This was added to a final concentration of  
898 1/1000 from the manufacturers stock solution. In addition to the on-column Dnase digest, an  
899 additional treatment of the eluted RNA was performed with TURBO DNA Free kit as per the

900 manufacturer's protocol. RNA was processed by Novogene using Illumina Ribo Zero method  
901 and NEBNext® Ultra™ Directional RNA Library Prep Kit to generate libraries which were  
902 sequenced on Illumina NovaSeq 6000 S4 flowcell with PE150. Reads were processed with  
903 FASTQC Groomer before mapping with HiSAT. BAM files were converted to bigwig format  
904 using bamCoverage (DeepTools) with a scaling factor applied to normalise the total reads to  
905 the median ERCC read values. Metaplots were generated using deepTools computematrix  
906 and plotProfile tools for dSSR and cSSR in reference-point mode (centre point of the SSR). PTU  
907 metaplots were generated using the same tools in scale-regions mode.

908

#### 909 *Splicing RT-PCR*

910 Analog-sensitive CRK9 (LmxM.27.1940) mutants were generated using Cas9 to perform  
911 precise genome editing to replace the codon encoding methionine at the gatekeeper position  
912 (M501) with a glycine or alanine residue (protocol adapted from<sup>68</sup>). Oligos sequences  
913 provided in **Table S1**. The validation of the CRK9 mutants was performed by sequencing using  
914 OL11605 and a dose response curve, set at  $2.5 \times 10^4$  cells ml<sup>-1</sup> treated with the bulky kinase  
915 inhibitors (BKIs: PP1 (1-(1,1-dimethylethyl)-3-(4-methylphenyl)-1H-pyrazolo[3,4-d]pyrimidin-  
916 4-amine), 1NM-PP1 (1-(1,1-dimethylethyl)-3-(1-naphthalenylmethyl)-1H-pyrazolo[3,4-  
917 d]pyrimidin-4-amine) and 1NA-PP1 (1-(1,1-dimethylethyl)-3-(1-naphthalenyl)-1H-  
918 pyrazolo[3,4-d]pyrimidin-4-amine)) in a range concentration varying from 0 to 120 μM. The  
919 viability of treated and untreated control was assessed after 72h, using Alamar blue at  
920 0.0025% (w/v). The parental T7/Cas9 cell line was used as control for the analog-sensitive  
921 CRK9 lines. The inhibition profile was analysed by nonlinear regression using Prism Version 9  
922 (GraphPad).

923

924 Cultures of promastigote *Lmx DiCre BDF5::6xHA<sup>-/+flx</sup>* were treated with DMSO or 300 nM  
925 rapamycin for 48 h then passaged to a density of  $2 \times 10^5$  cells ml<sup>-1</sup> for another 48 h. Positive  
926 controls for cis- and trans- splicing defects were provided by treating *L. mexicana* T7/Cas9  
927 CRK9<sup>M501G</sup> with 30 μM 1NM-PP1 for 3 h (15x the EC90 at 72h) . Total RNA was purified using  
928 NEB Monarch Total RNA MiniPrep Kit. cDNA was synthesised using NEB ProtoScript II with  
929 random hexamers. Triple-primer PCR was conducted to determine the trans-splicing of the SL  
930 RNA to LmxM.25.0910 with OL12370, OL12371 and OL12372. cis-splicing of the intron in  
931 polyA-polymerase (LmxM.08\_29.2600) was detected using OL OL12342 and OL12343. PCRs  
932 were performed with PCRBio Ultra Red Mix.

933

#### 934 *Statistics*

935 For routine statistical analyses data were analysed with Prism Version 9 (GraphPad). Western  
936 blot quantitation was performed using BioRad Imagemlab software using the Stain-Free Total  
937 Protein Channel as the normalisation channel.

938

939

940

941

942



943 **Supplemental Figures**

**A**

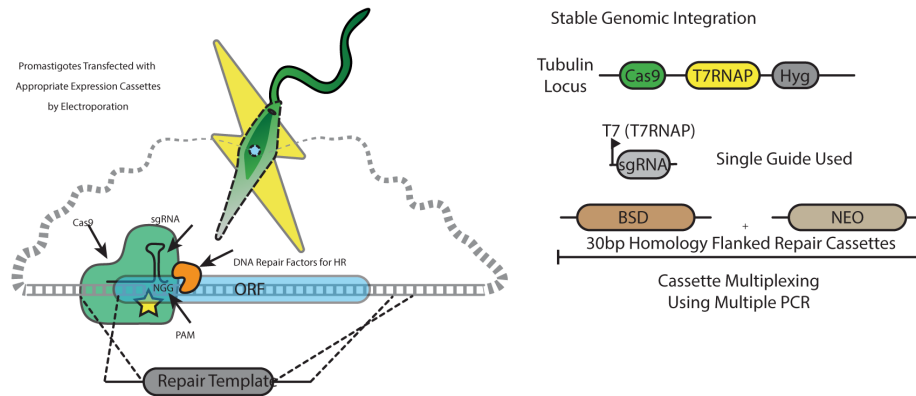

**B**

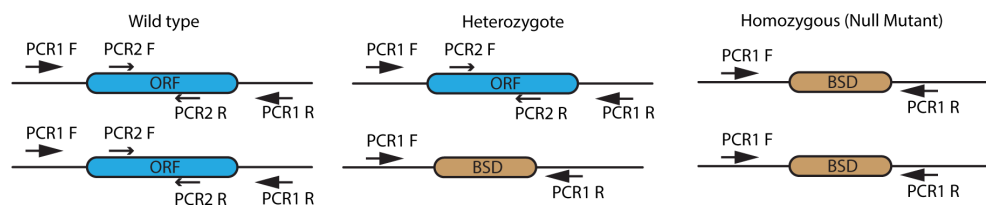

**C**

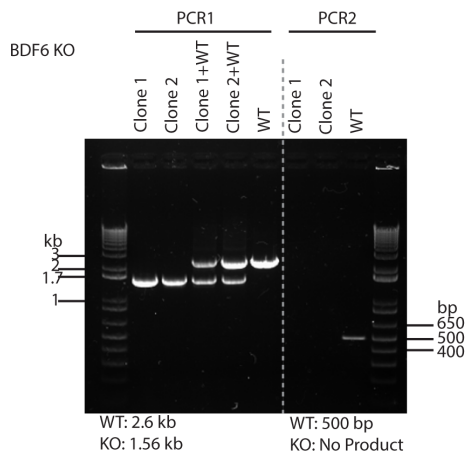

**D**

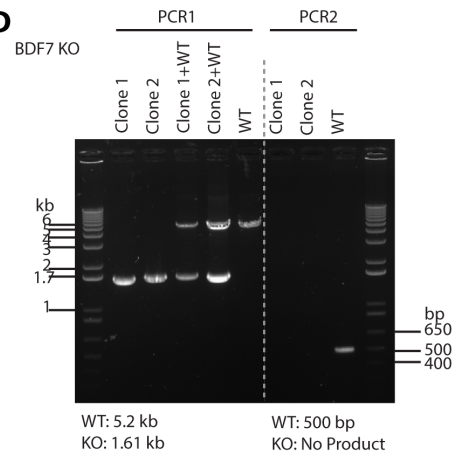

944

945

946 **Figure S1: CRISPR/Cas9 screening to identify non-essential bromodomain factors.** **A.** Cartoon  
 947 depicting the experimental strategy. **B.** Cartoon depicting the PCR strategy to define gene  
 948 knockouts isolated from CRISPR/Cas9 screening. **C.** Agarose gel PCR validation of *BDF6* null  
 949 mutants. **D.** Agarose gel showing PCR validation of *BDF7* null mutants.

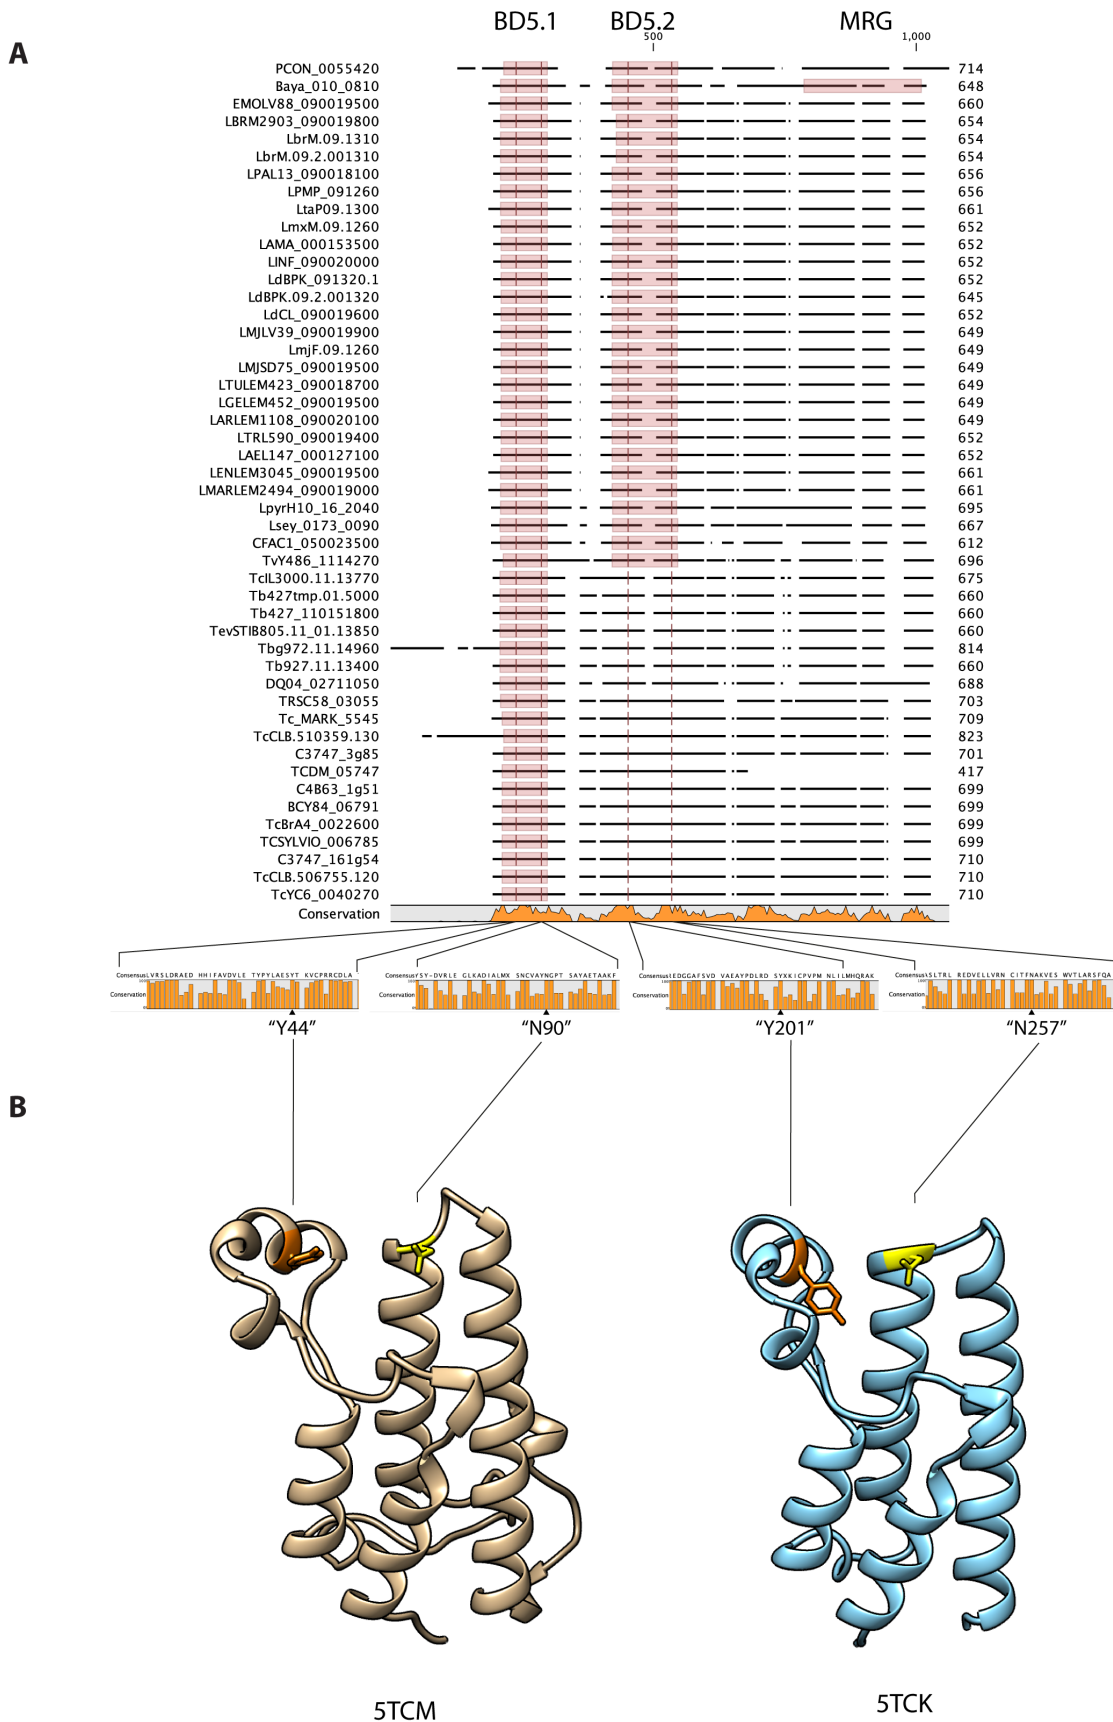

950

951 **Figure S2: CLUSTAL alignment of kinetoplastid BDF5 proteins. A.** Amino acid sequences of BDF5

952 syntenic orthologues were aligned using the Clustal Omega plugin for CLC. Domains that were

953 readily identifiable using the PFAM search plugin are annotated by shaded boxes, conserved  
 954 tyrosine and asparagine residues are annotated by red lines within the shaded BD5.1 and  
 955 BD5.2 domains. **B.** X-ray crystal structures of LdBDF5 bromodomains generated by the SGC and  
 956 deposited at the PDB, conserved tyrosine residues coloured orange and conserved asparagine  
 957 residues in yellow.

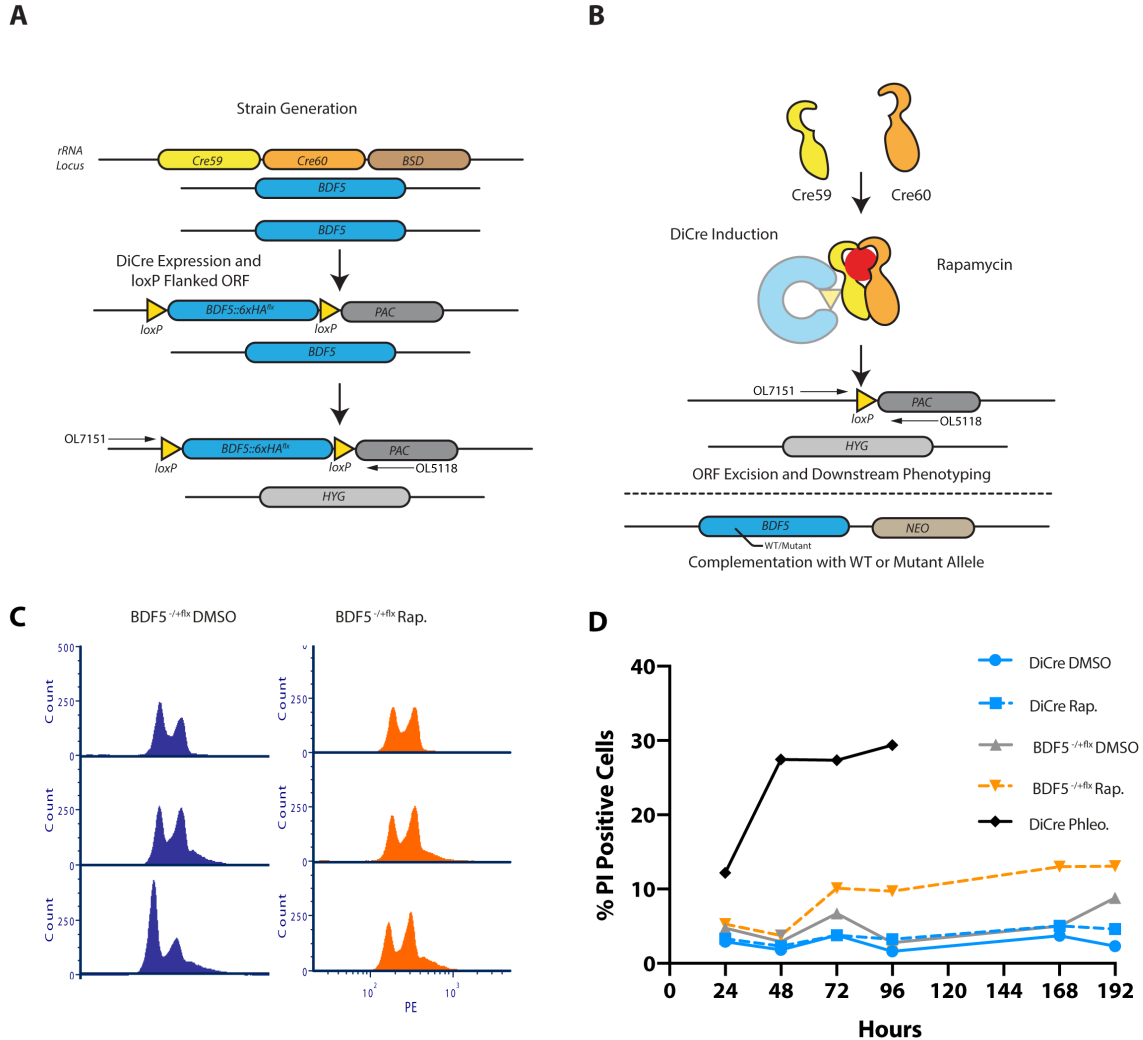

958  
 959 **Figure S3: Characterisation of BD5 using DiCre Inducible gene deletion in promastigotes.**

960 **A.** Cartoon representation of workflow to generate *Lmx*  
 961 *::DiCreΔbdf5::HYG/Δbdf5::BDF5::6xHA<sup>fllox</sup>*. **B.** Cartoon representation of floxed allele excision  
 962 using rapamycin to dimerise the split Cre recombinase, exemplifying the ability to introduce  
 963 add-back alleles for functional genetics. **C.** Flow cytometry of methanol fixed, RNase A treated,  
 964 propidium iodide stained promastigote cultures to characterise the effects of BDF5 knockout  
 965 on the cell cycle over a 72 h timecourse N=20,000 events. **D.** Live/dead analysis using flow  
 966 cytometry of non-fixed, propidium iodide treated promastigote cultures following BDF5  
 967 knockout. A 1 μg/ml phleomycin control was included. Points and error bars indicate mean ±  
 968 standard deviation, N=20,000 events.

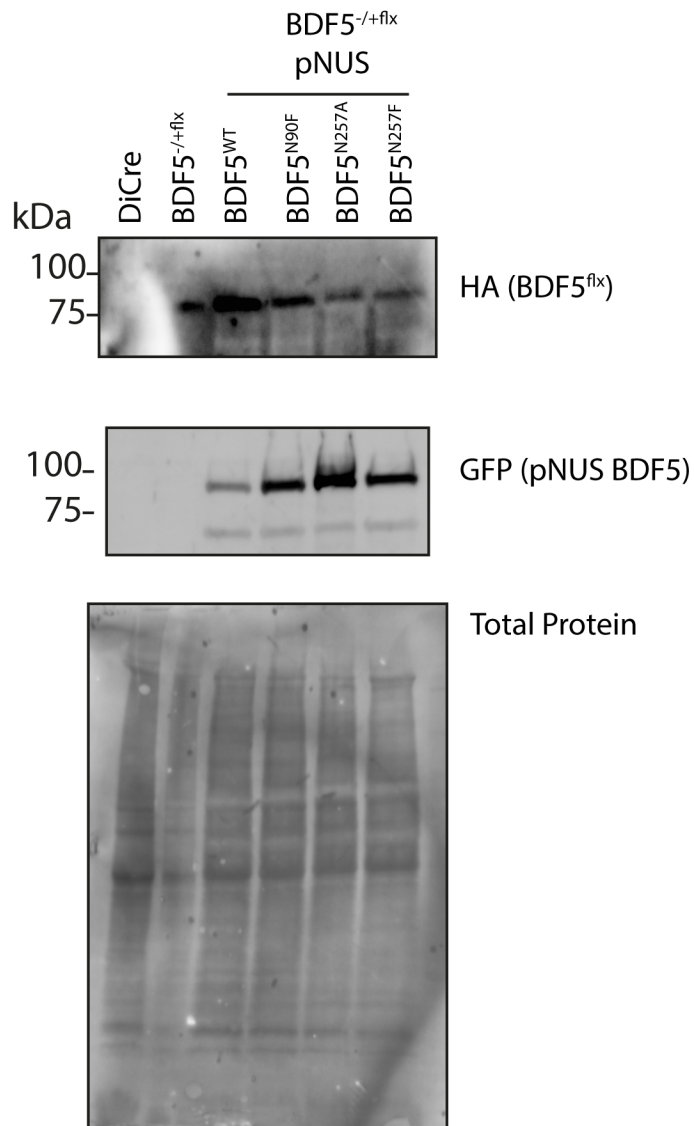

969  
970 **Figure S4: Episomal Expression of BDF5 mutant alleles.** Western blot analysis of cell lines  
971 expressing BDF5::GFP mutant alleles from pNUS episome vectors in the *Lmx*  
972  $::DiCre\Delta bdf5::HYG/\Delta bdf5::BDF5::6xHA^{flx}$  background.  
973

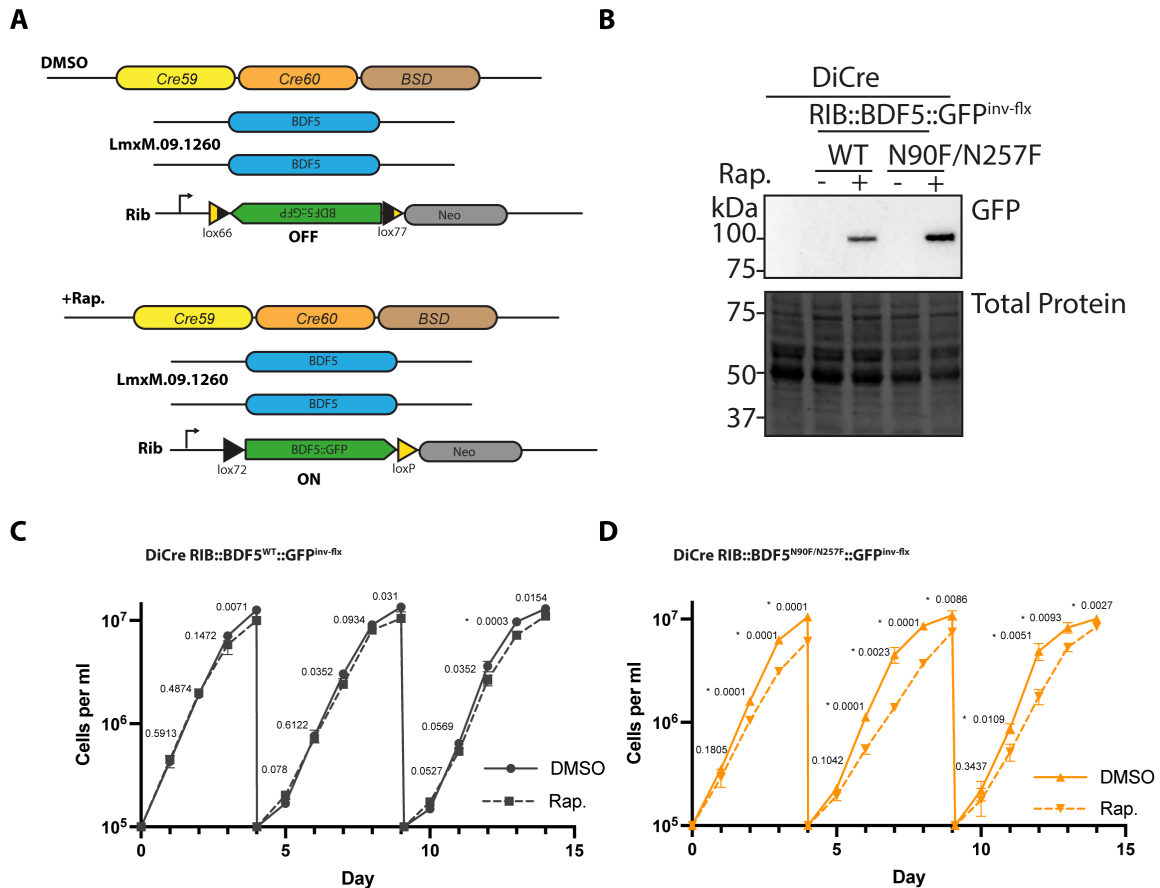

974

975

976 **Figure S5: Rapamycin inducible overexpression of BDF5 alleles.** **A.** Cartoon representing the

977 experimental set-up for expression of an extra BDF5 allele. *BDF5*<sup>N90F/N257F</sup>::GFP was cloned into

978 pRIB in an inverted orientation and flanked by directional loxP sites<sup>50</sup> yielding

979 *pRIB::BDF5*<sup>N90F/N257F</sup>::GFP<sup>inv</sup>. After integrating this into *Lmx::DiCre*, clones were isolated and

980 treated with 300 nM rapamycin to induce expression of the BDF5<sup>N90F/N257F</sup>::GFP mutant

981 protein. A control strain was also generated to express a wild-type *BDF5* allele in the same

982 manner **B.** Western blot analysis of cultures from C and D at the 48 h timepoint of the second

983 growth cycle. **C.** Growth curve of promastigote cultures of *DiCre::BDF5*::GFP<sup>inv-flx</sup> treated with

984 rapamycin or DMSO. Data points represent mean values ± standard deviation. N=3 **D.** Growth

985 curve of promastigote cultures of *DiCre::BDF5*<sup>N90F/N257F</sup>::GFP<sup>inv-flx</sup> treated with rapamycin or

986 DMSO. Data points represent mean values ± standard deviation N=3. For C and D repeated t-

987 tests were performed using Prism (GraphPad), p-values are annotated and those marked \*

988 were defined as significant.

988

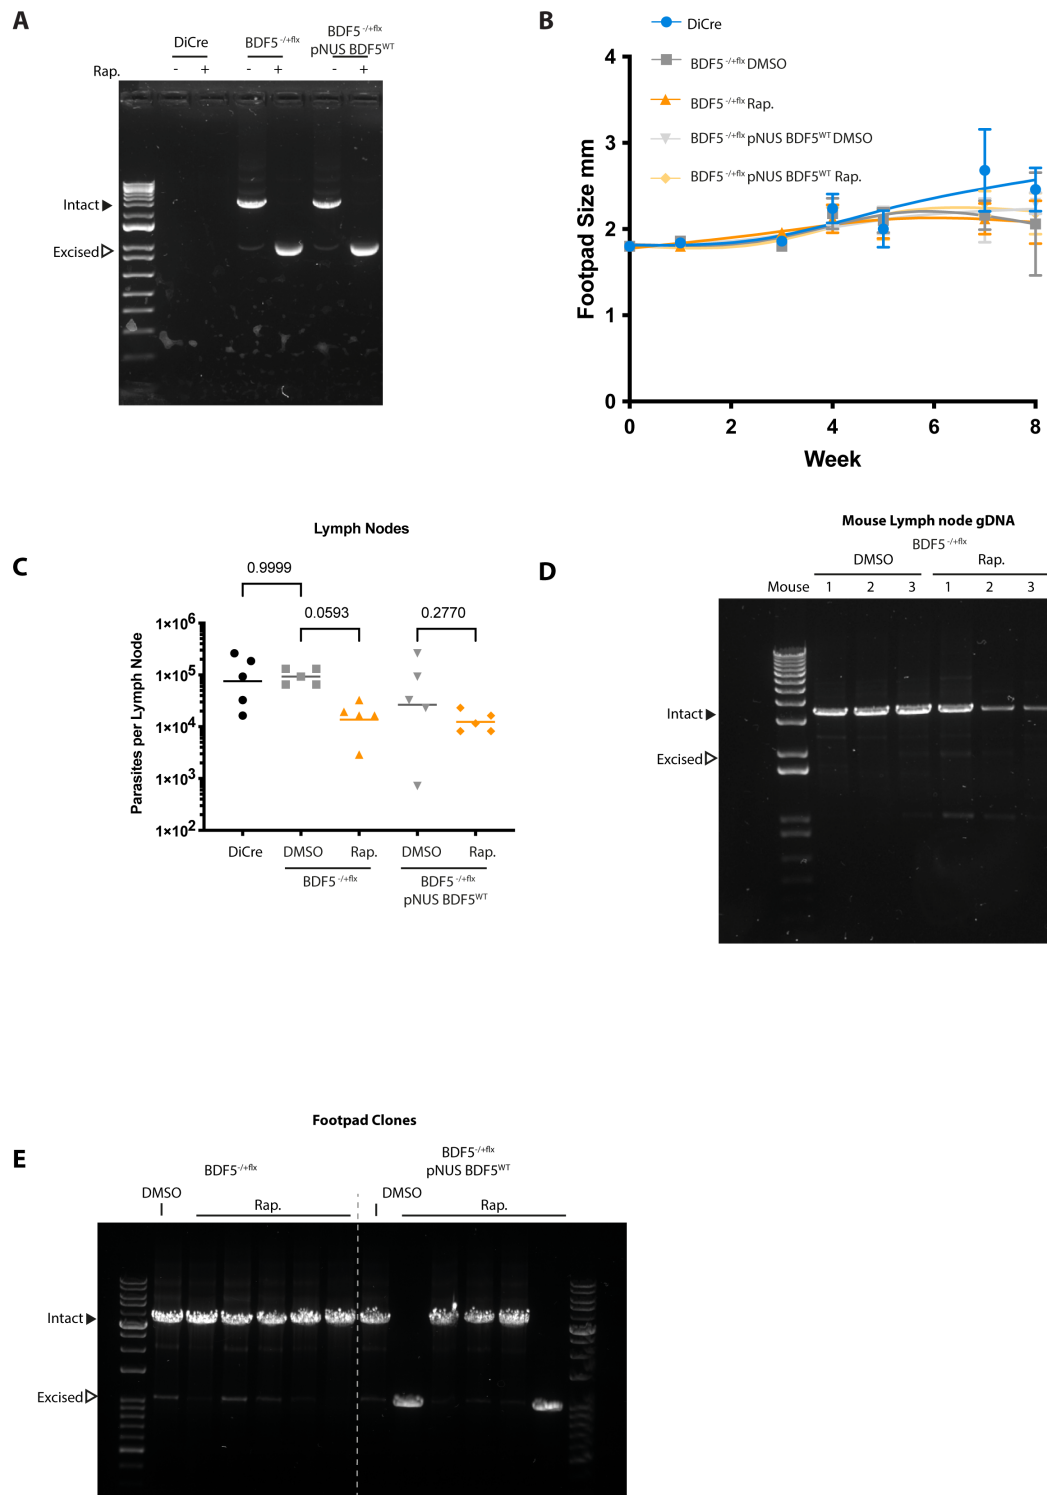

989

990 **Figure S6: Characterisation of BDF5 using DiCre inducible gene deletion in murine infection. A.**

991 **PCR and agarose gel analysis of stationary phase cultures used to infect mice. B.**

992 **Measurements of footpad lesion size of mice infected with indicated parasite strains. Points**

993 **and error bars indicate mean  $\pm$  standard deviation, N=5. C. Parasite burdens from infected**

994 **mouse popliteal lymph nodes determined by limiting dilution, individual points for each mouse**

995 **with median values indicated by line. Comparisons of Kruskal-Wallis test with Dunn's**

996 **correction indicate by lines, associated p-values written above, n=5. D. Agarose gel**

997 **exemplifying PCR analysis of genomic DNA extracted from popliteal lymph nodes of mice**



998 infected with the BDF5::6xHA<sup>-/+flx</sup> cultures that were treated with rapamycin or not, indicating  
 999 retention of the BDF5 allele at 8-weeks post-infection. E. PCR and agarose gel analysis  
 1000 exemplifying clones surviving as promastigotes following clonogenic assay to detect BDF5<sup>-/+flx</sup>  
 1001 allele.

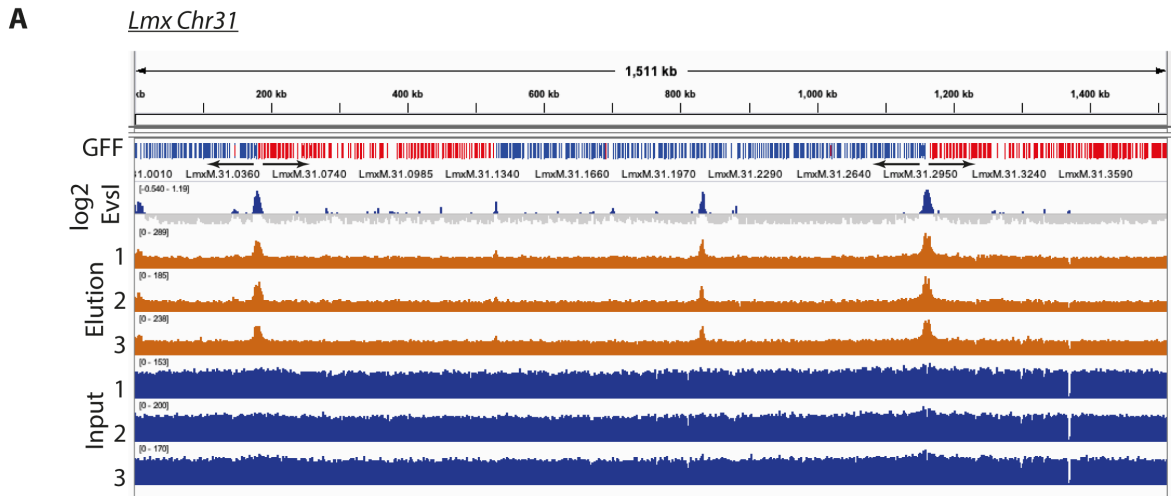

**B** Proportion of SSRs with Called Peak

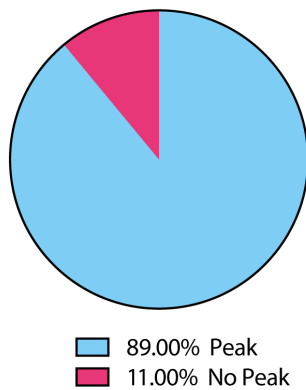

**C**

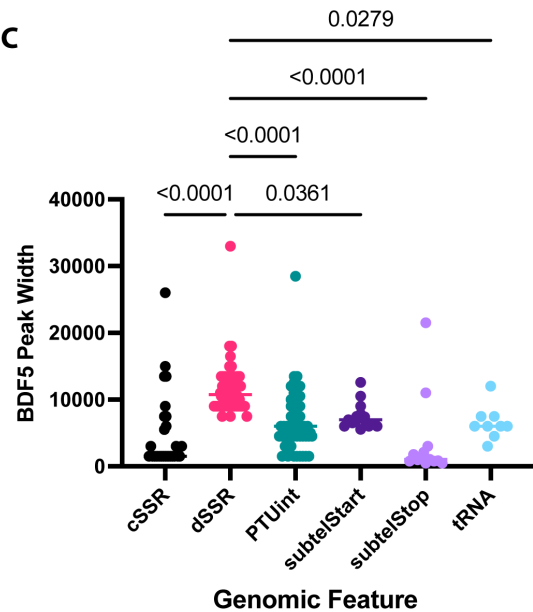

**D**

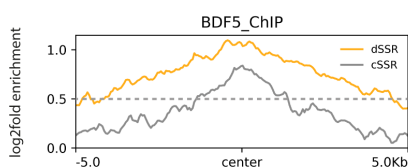

**E**

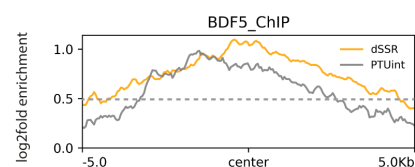

1002  
 1003 **Figure S7: ChIP-seq analysis of BDF5 distribution on chromatin.** A. Example of IGV genome  
 1004 browser view of chromosome 31 indicating the genes in polycistronic transcription units  
 1005 (colour and arrow coded by direction), the read depth for input and eluted sample of the  
 1006 ChIP-seq (N=3) and the enrichment of BDF5 on a log<sub>2</sub> fold scale, GFF (gene feature file)  
 1007 indicates gene CDS coloured by strand (red+, blue-). B. Pie chart indicating the proportion of  
 1008 SSRs with a BDF5 enriched peak. C. BDF5 peak size at different genomic regions as defined by  
 1009 MACS2 algorithm to call the enriched peaks. cSSR (convergent strand switch region), dSSR  
 1010 (divergent strand switch region), PTUint (internal PTU peak), subtelStart (subtelomeric peak

1011 consistent with PTU transcriptional start), subtelStop (subtelomeric peak consistent with PTU  
 1012 transcriptional stop), tRNA (tRNA gene located away from any of the other features). Values  
 1013 above denote p-value from Kruskal-Wallis test to compare samples. **D.** Metaplot of average  
 1014 BDF5 fold enrichment at dSSR (n=60) and cSSR (n=40) regions. **E.** Metaplot of BDF5 average  
 1015 BDF5 fold enrichment at dSSR (n=60) and PTU internal peaks (n=56).  
 1016

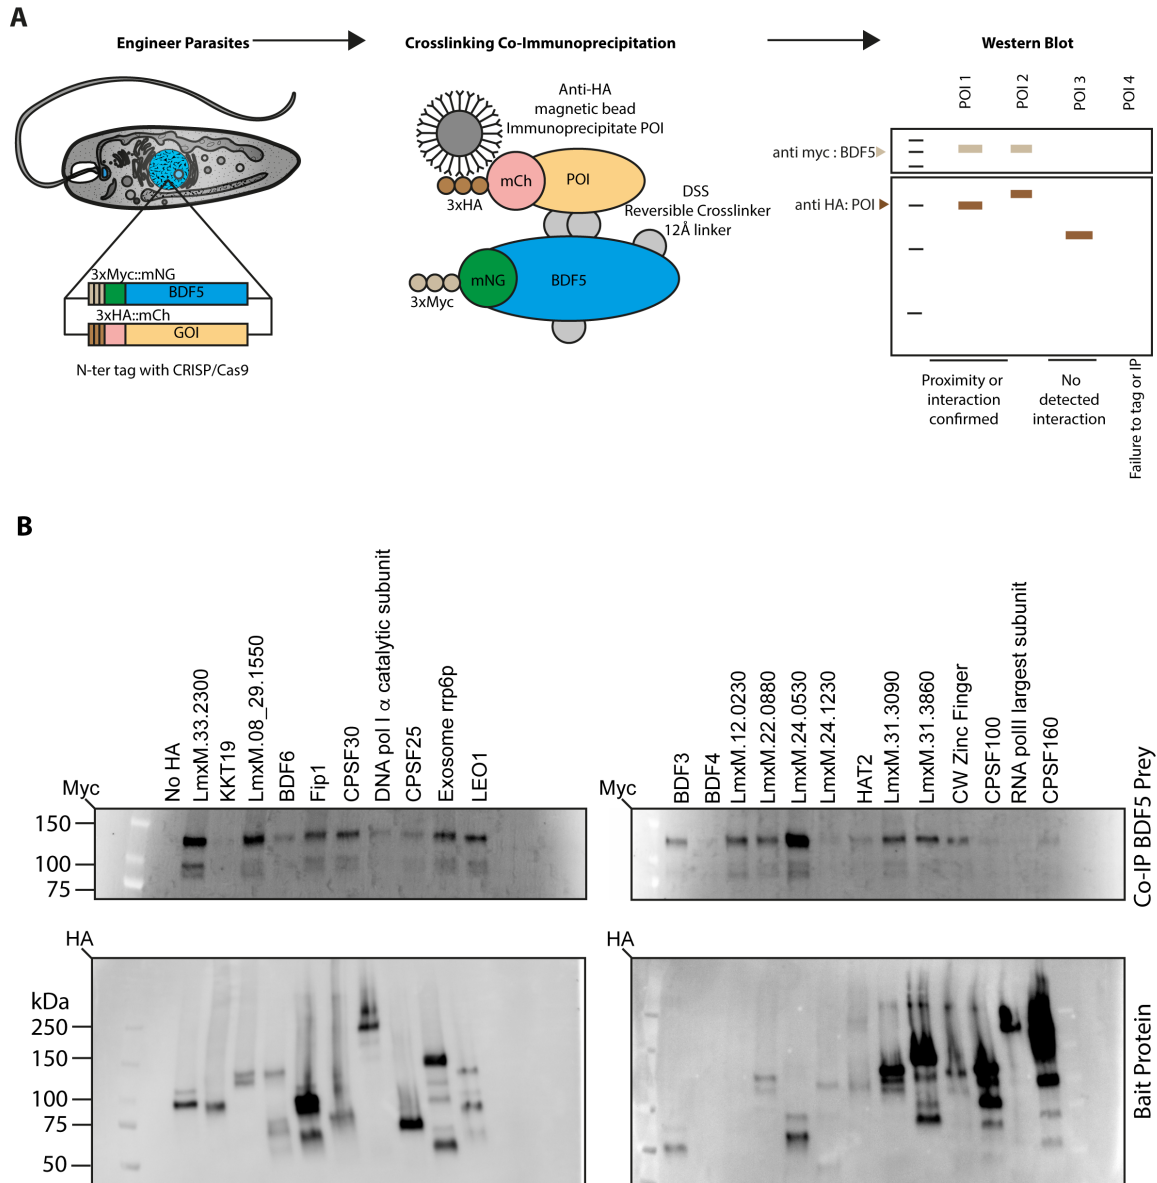

1017 **Figure S8: Co-immunoprecipitation analysis of BDF5-proximal proteins.** **A.** cartoon of  
 1018 experimental workflow. BDF5-proximal proteins identified by XL-BioID proteins were HA-  
 1019 tagged in the *LmxT7/Cas9 3xmyc::mNG::BDF5* strain to generate a panel of cell lines containing  
 1020 both a HA-tagged protein of interest (POI) and myc-tagged BDF5. **B.** The HA-tagged proteins  
 1021 were used as bait in an anti-HA immunoprecipitation and co-precipitating (co-IP) myc-tagged  
 1022 BDF5 protein was detected using western blot with anti-myc (Upper Panel). Confirmation of  
 1023 precipitation of the bait protein was confirmed by western blot (lower panel). The presence of  
 1024 BDF5 co-precipitating with a bait POI confirms the XL-BioID observations as being robust.  
 1025

1026  
 1027

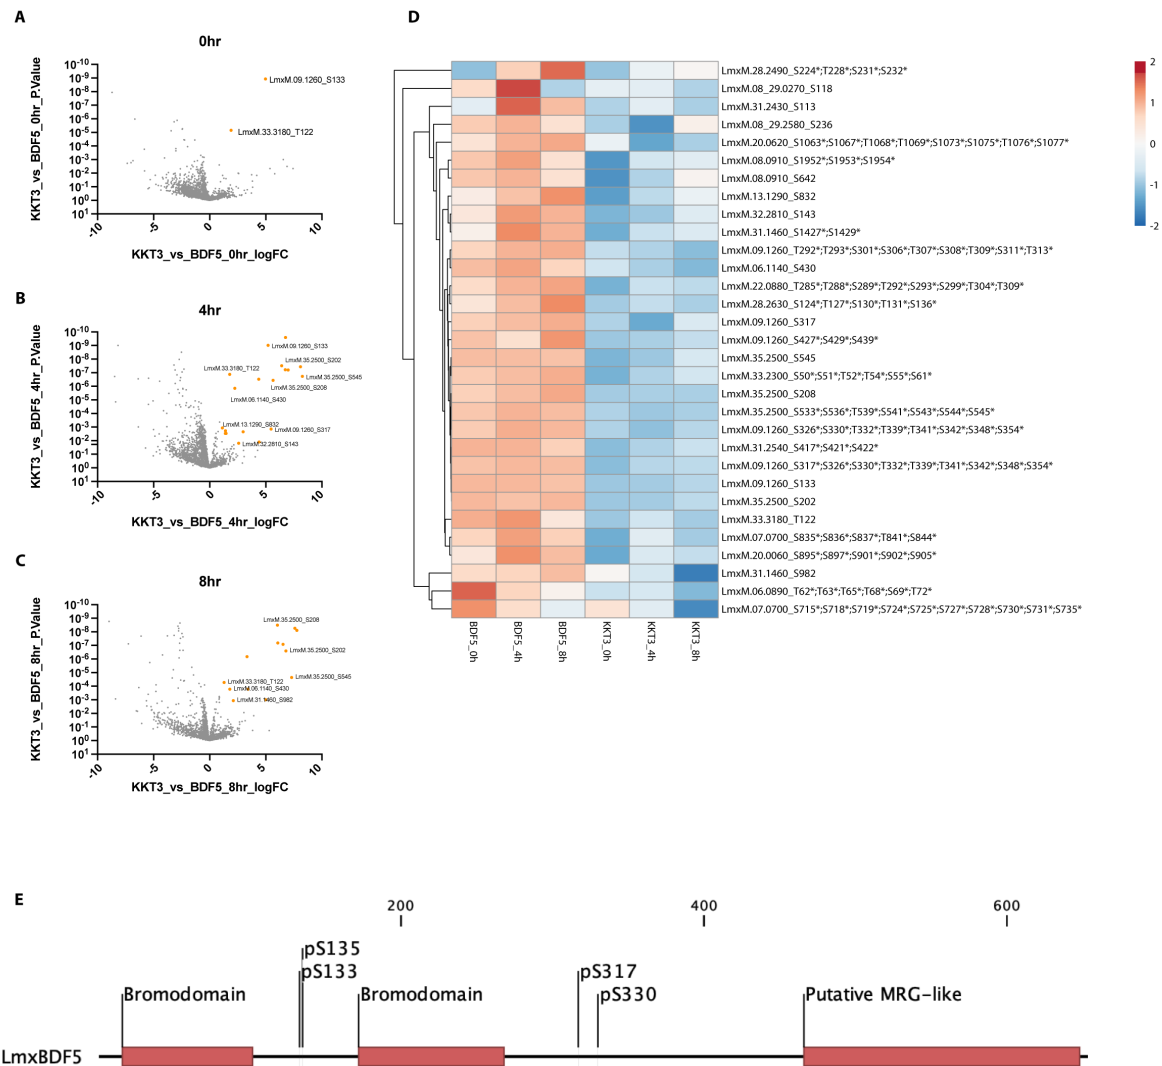

1028

1029

1030 Figure S9: Proximity phosphoproteomic analysis of BDF5 across the cell cycle. A, B and C.

1031 Volcano plots of phosphopeptide enrichment and confidence over 0 h, 4 h and 8 h release

1032 from hydroxyurea synchronisation. Ambiguous phosphosite localisations are denoted with a

1033 \*.

1034 D. Heatmap of proximal phosphosites represented by median values of 5 replicates after

1035 log<sub>2</sub>+1 transformation and data centring. Samples depicted are the BDF5 and KKT3 0 h, 4 h

1036 and 8 h timepoints.

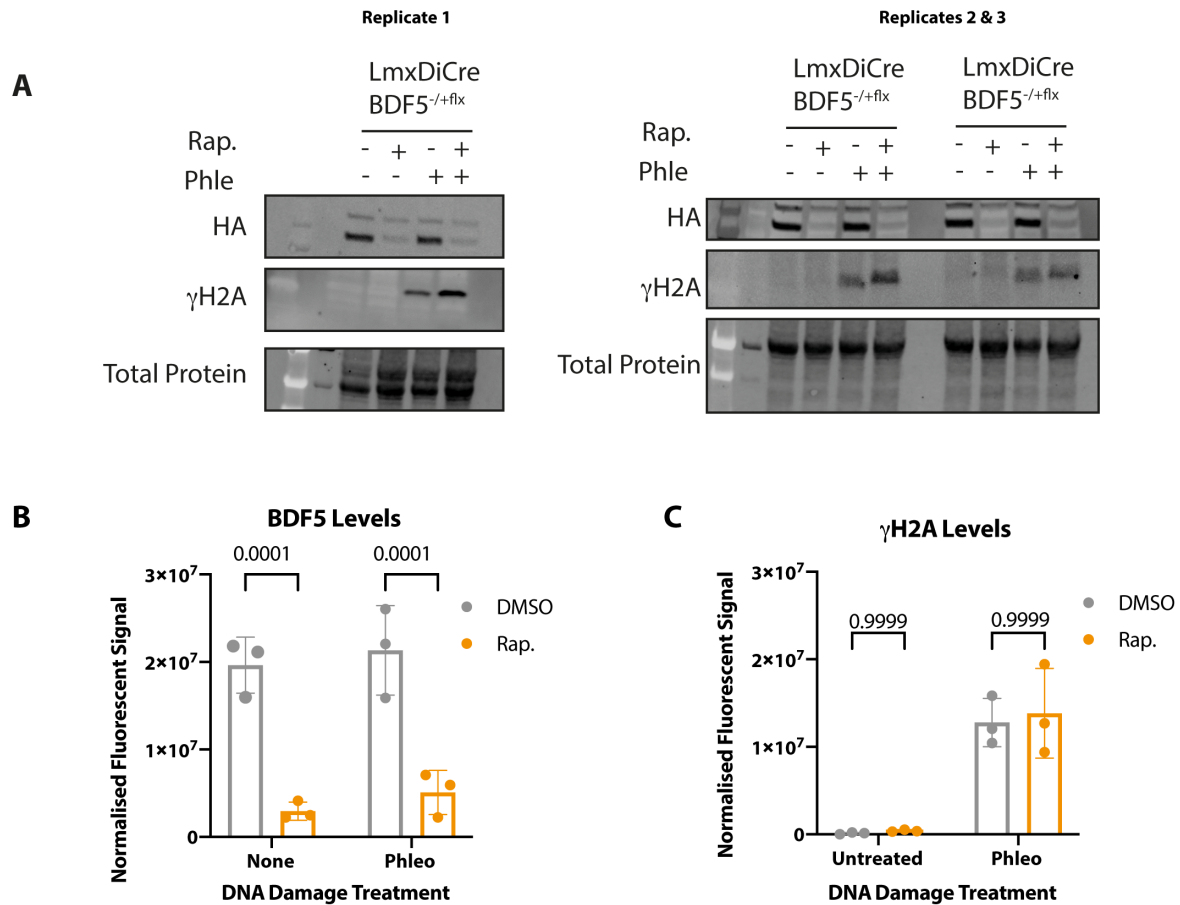

1037  
1038  
1039  
1040  
1041  
1042  
1043  
1044  
1045  
1046  
1047

**Figure S10: DNA damage response in BDF5 depleted cells.** **A.** Western blot analysis of cultures treated with DMSO or Rapamycin to delete the floxed allele of *BDF5* in *BDF5<sup>-/+flx</sup>* for 48 h followed by passaging to  $2 \times 10^5$  cells  $\text{ml}^{-1}$ , another 48 h of rapamycin treatment with the final 24 h including or not  $1 \mu\text{g ml}^{-1}$  of phleomycin (Phle). BDF5::6xHA levels and  $\gamma$ H2A levels were assessed by Western blot with anti-HA and Anti- $\gamma$ H2A antibodies respectively. (N=3). **B.** Normalised quantification of chemiluminescent signal of BDF5 bands. Data points and bars indicate mean  $\pm$  SD, N=3. **C.** Normalised quantification of chemiluminescent signal of  $\gamma$ H2A bands. Data points and bars indicate mean  $\pm$  SD, data compared by 2-way ANOVA, p-values indicated above. N=3.

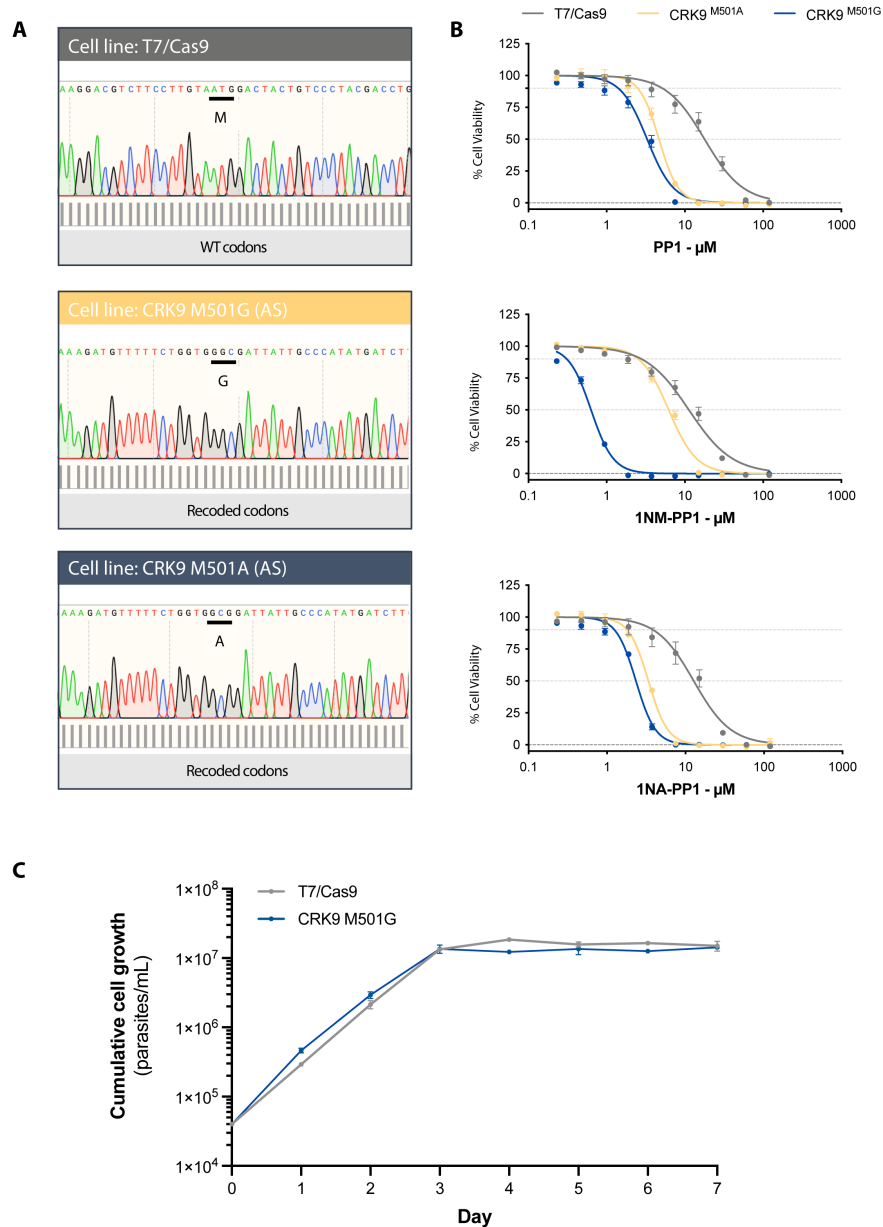

1048

1049

1050 **Figure S11: Generation of CRK9 analog-sensitised strains. A.** Sanger sequencing of *CRK9* in *L.*

1051 *mexicana* T7/Cas9 and precision-edited mutants showing homozygous strains encoding small

1052 gatekeeper mutations M501G and M501A. **B.** Dose-response curves of promastigote cell

1053 viability after 72 h treatment in varying concentrations of bulky-kinase inhibitors PP1, 1NM-

1054 PP1 and 1NA-PP1, measured by alarm blue method, mean $\pm$ SD, n=3. **C.** Growth curve of

1055 promastigote cultures of T7.Cas9 and the CRK9<sup>M501A</sup> strain indicating the small gatekeeper

1055 residue does not impact growth of promastigotes, mean $\pm$ SD, n=3.

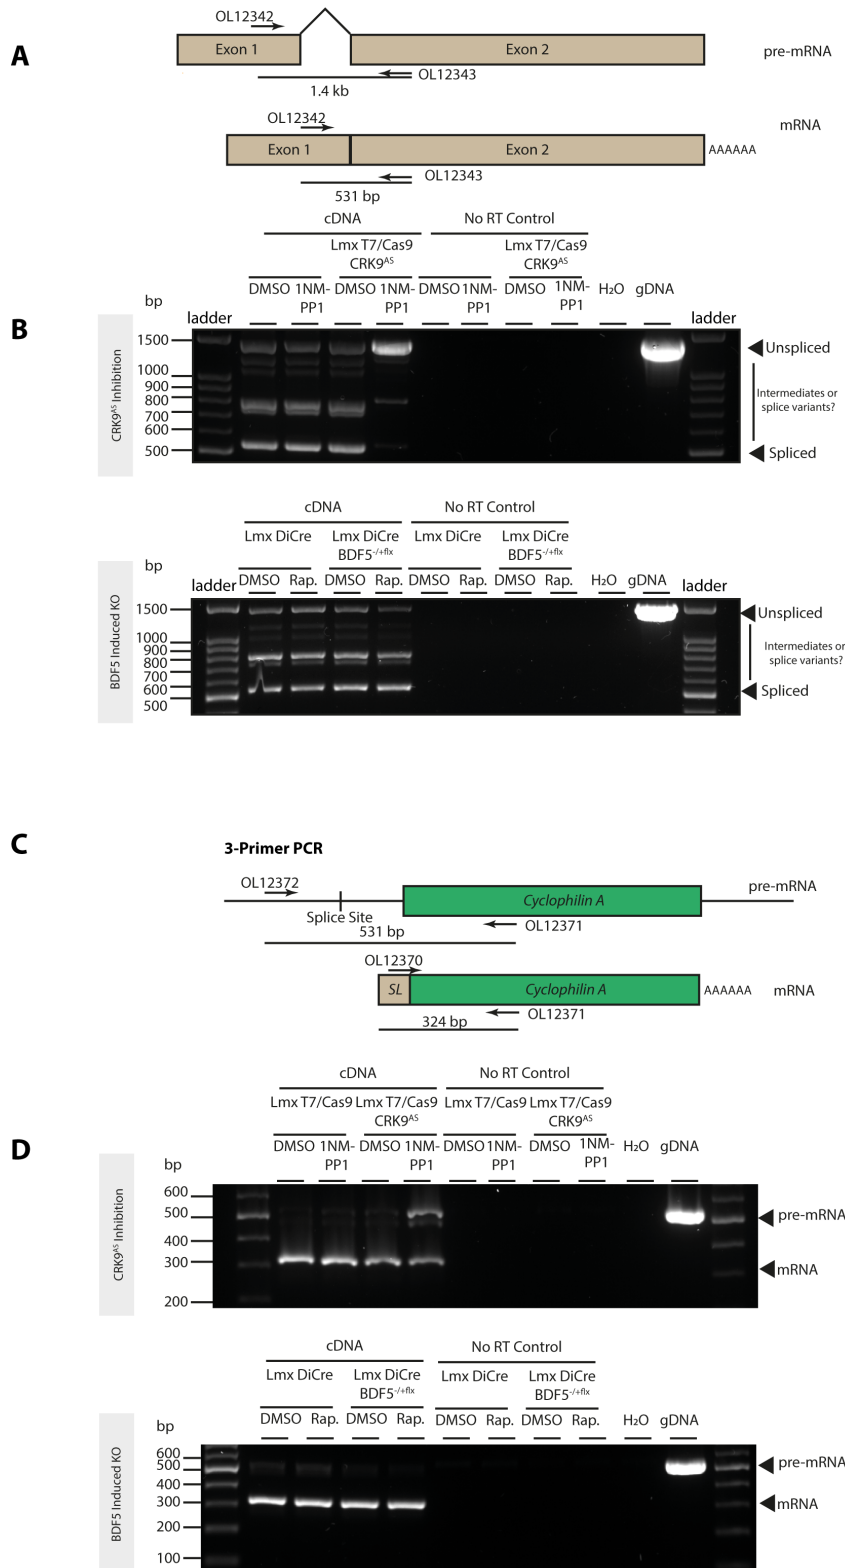

1056  
1057  
1058  
1059  
1060  
1061

**Figure S12: Effect of BDF5 on cis- and trans-splicing of mRNA.** **A.** Cartoon showing the strategy of the RT-PCR assay to detect cis-splicing of polyA-polymerase mRNA (LmxM.08\_29.2600) after CRK9 inhibition (a positive control for splicing defects<sup>68</sup>) or BDF5 deletion. Cells were treated with DMSO, Rapamycin or 1NM-PP1. **B.** Agarose gel of RT-PCR assay to detect cis-splicing of polyA-polymerase mRNA (LmxM.08\_29.2600) after CRK9



1062 inhibition or BDF5 deletion. cDNA prepared using random hexamers was used to prime the  
1063 assay, thus capturing the pre-mRNA and mRNA. *L. mexicana* T7/Cas9 was used as the control  
1064 strain for the CRK9 analog-sensitized strain. Accumulation of the pre-mRNA is only observed  
1065 when CRK9<sup>AS</sup> is inhibited with 1NM-PP1. No-RT controls were included to exclude gDNA  
1066 contamination. H<sub>2</sub>O indicates a water control to exclude master mix contamination, and  
1067 gDNA was used as a positive control to exemplify the unspliced band size. **C.** Cartoon showing  
1068 the strategy of the triple-primer RT-PCR assay to detect trans-splicing of Cyclophilin A mRNA  
1069 (LmxM.25.0910) after CRK9 inhibition or BDF5 deletion. **D.** Agarose gel of triple-primer RT-  
1070 PCR assay to detect trans-splicing of Cyclophilin A mRNA (LmxM.25.0910) after CRK9  
1071 inhibition or BDF5 deletion. cDNA prepared using random hexamers was used to prime the  
1072 assay, thus capturing the pre-mRNA and mRNA. No-RT controls were included to exclude  
1073 gDNA contamination. H<sub>2</sub>O indicates a water control to exclude master mix contamination,  
1074 and gDNA was used as a positive control to exemplify the unspliced band size. Accumulation  
1075 of the pre-mRNA is only observed when CRK9<sup>AS</sup> is inhibited with 1NM-PP1.  
1076  
1077

1078 **References**

1079

- 1080 1. Cramer, P. Organization and regulation of gene transcription. *Nature* **573**, 45–54 (2019).
- 1081 2. Filippakopoulos, P. *et al.* Histone Recognition and Large-Scale Structural Analysis of the Human  
1082 Bromodomain Family. *Cell* **149**, 214–231 (2012).
- 1083 3. Zaware, N. & Zhou, M.-M. Bromodomain biology and drug discovery. *Nat Struct Mol Biol* **26**, 870–879  
1084 (2019).
- 1085 4. Cochran, A. G., Conery, A. R. & Sims, R. J. Bromodomains: a new target class for drug development. *Nat Rev*  
1086 *Drug Discov* **18**, 609–628 (2019).
- 1087 5. Brand, M. *et al.* Small molecule inhibitors of bromodomain - Acetyl-lysine interactions. *ACS Chemical Biology*  
1088 **10**, 22–39 (2015).
- 1089 6. Wu, Q. *et al.* A chemical toolbox for the study of bromodomains and epigenetic signaling. *Nature*  
1090 *communications* 1–14 (2019) doi:10.1038/s41467-019-09672-2.
- 1091 7. Burza, S., Croft, S. L. & Boelaert, M. Leishmaniasis. *Lancet* **392**, 951–970 (2018).
- 1092 8. Clayton, C. Regulation of gene expression in trypanosomatids: living with polycistronic transcription. *Open*  
1093 *biology* **9**, 190072–24 (2019).
- 1094 9. Wedel, C., Förstner, K. U., Derr, R. & Siegel, T. N. GT-rich promoters can drive RNA pol II transcription and  
1095 deposition of H2A.Z in African trypanosomes. *Embo J* **36**, 2581–2594 (2017).
- 1096 10. Siegel, T. N., Gunasekera, K., Cross, G. A. M. & Ochsenreiter, T. Gene expression in *Trypanosoma brucei*:  
1097 lessons from high-throughput RNA sequencing. *Trends in parasitology* **27**, 434–441 (2011).
- 1098 11. Pablos, L. M. de *et al.* The mRNA-bound Proteome of *Leishmania mexicana*: Novel Genetic Insight into an  
1099 Ancient Parasite\*. *Mol Cell Proteomics* **18**, 1271–1284 (2019).
- 1100 12. Rogers, M. B. *et al.* Chromosome and gene copy number variation allow major structural change between  
1101 species and strains of *Leishmania*. *Genome research* **21**, 2129–2142 (2011).
- 1102 13. Dujardin, J.-C., Mannaert, A., Durrant, C. & Cotton, J. a. Mosaic aneuploidy in *Leishmania*: the perspective  
1103 of whole genome sequencing. *Trends in parasitology* **30**, 554–555 (2014).
- 1104 14. Thomas, S., Green, A., Sturm, N. R., Campbell, D. A. & Myler, P. J. Histone acetylations mark origins of  
1105 polycistronic transcription in *Leishmania major*. *BMC Genomics* **10**, (2009).
- 1106 15. Kumar, D., Rajanala, K., Minocha, N. & Saha, S. Histone H4 lysine 14 acetylation in *Leishmania donovani* is  
1107 mediated by the MYST-family protein HAT4. *Microbiology (Reading, England)* **158**, 328–337 (2012).
- 1108 16. Yadav, A., Chandra, U. & Saha, S. Histone acetyltransferase HAT4 modulates navigation across G2/M and  
1109 re-entry into G1 in *Leishmania donovani*. *Scientific Reports* 1–15 (2016) doi:10.1038/srep27510.
- 1110 17. Kumar, D. & Saha, S. HAT3-mediated acetylation of PCNA precedes PCNA monoubiquitination following  
1111 exposure to UV radiation in *Leishmania donovani*. *Nucleic Acids Research* **43**, 5423–5441 (2015).

- 1112 18. Chandra, U., Yadav, A., Kumar, D. & Saha, S. Cell cycle stage-specific transcriptional activation of cyclins  
1113 mediated by HAT2-dependent H4K10 acetylation of promoters in *Leishmania donovani*. *PLoS Pathogens* **13**,  
1114 e1006615 (2017).
- 1115 19. Siegel, T. N. *et al.* Four histone variants mark the boundaries of polycistronic transcription units in  
1116 *Trypanosoma brucei*. *Genes & Development* **23**, 1063–1076 (2009).
- 1117 20. Kraus, A. J. *et al.* Distinct roles for H4 and H2A.Z acetylation in RNA transcription in African trypanosomes.  
1118 *Nature communications* 1–15 (2020) doi:10.1038/s41467-020-15274-0.
- 1119 21. Zhang, N. *et al.* Landscapes of Protein Posttranslational Modifications of African *Trypanosoma* Parasites.  
1120 *iScience* **23**, 101074 (2020).
- 1121 22. Staneva, D. P. *et al.* A systematic analysis of *Trypanosoma brucei* chromatin factors identifies novel protein  
1122 interaction networks associated with sites of transcription initiation and termination. *Genome Res*  
1123 gr.275368.121 (2021) doi:10.1101/gr.275368.121.
- 1124 23. Schulz, D. *et al.* Bromodomain Proteins Contribute to Maintenance of Bloodstream Form Stage Identity in  
1125 the African Trypanosome. *PLoS Biology* **13**, 1–38 (2015).
- 1126 24. Alsford, S. *et al.* High-throughput phenotyping using parallel sequencing of RNA interference targets in the  
1127 African trypanosome. *Genome research* (2011) doi:10.1101/gr.115089.110.
- 1128 25. Alsford, S. & Horn, D. Cell-cycle-regulated control of VSG expression site silencing by histones and histone  
1129 chaperones ASF1A and CAF-1b in *Trypanosoma brucei*. *Nucleic Acids Research* **40**, 10150–10160 (2012).
- 1130 26. Ritagliati, C. *et al.* Glycosomal bromodomain factor 1 from *Trypanosoma cruzi* enhances trypomastigote  
1131 cell infection and intracellular amastigote growth. *The Biochemical journal* **473**, 73–85 (2015).
- 1132 27. Alonso, V. L., Ritagliati, C., Cribb, P., Cricco, J. A. & Serra, E. C. Overexpression of bromodomain factor 3 in  
1133 *Trypanosoma cruzi* (TcBDF3) affects differentiation of the parasite and protects it against bromodomain  
1134 inhibitors. *FEBS Journal* **283**, 2051–2066 (2016).
- 1135 28. Alonso, V. L. *et al.* *Trypanosoma cruzi* bromodomain factor 3 binds acetylated  $\alpha$ -tubulin and concentrates  
1136 in the flagellum during metacyclogenesis. *Eukaryotic Cell* **13**, 822–831 (2014).
- 1137 29. Villanova, G. V. *et al.* *Trypanosoma cruzi* bromodomain factor 2 (BDF2) binds to acetylated histones and is  
1138 accumulated after UV irradiation. *International Journal for Parasitology* **39**, 665–673 (2009).
- 1139 30. Ivens, A. C. *et al.* The genome of the kinetoplastid parasite, *Leishmania major*. *Science (New York, N.Y.)* **309**,  
1140 436–442 (2005).
- 1141 31. Zimmermann, L. *et al.* A Completely Reimplemented MPI Bioinformatics Toolkit with a New HHpred Server  
1142 at its Core. *Journal of molecular biology* **430**, 2237–2243 (2018).
- 1143 32. Bowman, B. R. *et al.* Multipurpose MRG Domain Involved in Cell Senescence and Proliferation Exhibits  
1144 Structural Homology to a DNA-Interacting Domain. *Structure* **14**, 151–158 (2006).
- 1145 33. Zhang, P. *et al.* The MRG domain of human MRG15 uses a shallow hydrophobic pocket to interact with the  
1146 N-terminal region of PAM14. *Protein Science* **15**, 2423–2434 (2006).
- 1147 34. Bertram, M. J. & Pereira-Smith, O. M. Conservation of the MORF4-related gene family: identification of a  
1148 new chromo domain subfamily and novel protein motif. *Gene* **266**, 111–121 (2001).

- 1149 35. Bamborough, P. & Chung, C. Fragments in bromodomain drug discovery. *Medchemcomm* **6**, 1587–1604  
1150 (2015).
- 1151 36. Cho, C. *et al.* Structural basis of nucleosome assembly by the Abo1 AAA+ ATPase histone chaperone.  
1152 *Nature communications* 1–13 (2019) doi:10.1038/s41467-019-13743-9.
- 1153 37. Morozumi, Y. *et al.* Atad2 is a generalist facilitator of chromatin dynamics in embryonic stem cells. *Journal*  
1154 *of molecular cell biology* **8**, 349–362 (2016).
- 1155 38. Gradolatto, A. *et al.* A noncanonical bromodomain in the AAA ATPase protein Yta7 directs chromosomal  
1156 positioning and barrier chromatin activity. *Molecular and cellular biology* **29**, 4604–4611 (2009).
- 1157 39. Goos, C., Dejung, M., Janzen, C. J., Butter, F. & Kramer, S. The nuclear proteome of *Trypanosoma brucei*.  
1158 *PLoS ONE* **12**, e0181884 (2017).
- 1159 40. Opperdoes, F. R., Butenko, A., Flegontov, P., Yurchenko, V. & Lukeš, J. Comparative Metabolism of Free-  
1160 living Bodo saltans and Parasitic Trypanosomatids. *Journal of Eukaryotic Microbiology* 657–678 (2016)  
1161 doi:10.1111/jeu.12315.
- 1162 41. Aurrecochea, C. *et al.* EuPathDB: the eukaryotic pathogen genomics database resource. *Nucleic Acids*  
1163 *Research* **45**, D581–D591 (2017).
- 1164 42. Beneke, T. *et al.* A CRISPR Cas9 high-throughput genome editing toolkit for kinetoplastids. *Royal Society*  
1165 *Open Science* **May**, (2017).
- 1166 43. Fiebig, M., Kelly, S. & Gluenz, E. Comparative Life Cycle Transcriptomics Revises *Leishmania mexicana*  
1167 Genome Annotation and Links a Chromosome Duplication with Parasitism of Vertebrates. *PLOS Pathogens* **11**,  
1168 e1005186-28 (2015).
- 1169 44. Jones, N. G., Catta-Preta, C. M. C., Lima, A. P. C. A. & Mottram, J. C. Genetically Validated Drug Targets in  
1170 *Leishmania*: Current Knowledge and Future Prospects. *ACS Infectious Diseases* acsinfecdis.7b00244 (2018)  
1171 doi:10.1021/acsinfecdis.7b00244.
- 1172 45. Duncan, S. M. *et al.* Conditional gene deletion with DiCre demonstrates an essential role for CRK3 in  
1173 *Leishmania mexicana* cell cycle regulation. *Molecular Microbiology* **100**, 931–944 (2016).
- 1174 46. Damianou, A. *et al.* Essential roles for deubiquitination in *Leishmania* life cycle progression. *Plos Pathog* **16**,  
1175 e1008455 (2020).
- 1176 47. Tetaud, E., Lecuix, I., Sheldrake, T., Baltz, T. & Fairlamb, A. H. A new expression vector for *Crithidia*  
1177 *fasciculata* and *Leishmania*. *Mol Biochem Parasit* **120**, 195–204 (2002).
- 1178 48. Philpott, M. *et al.* Assessing cellular efficacy of bromodomain inhibitors using fluorescence recovery after  
1179 photobleaching. *Epigenet Chromatin* **7**, 14 (2014).
- 1180 49. Umehara, T. *et al.* Structural Basis for Acetylated Histone H4 Recognition by the Human BRD2  
1181 Bromodomain\*. *J Biol Chem* **285**, 7610–7618 (2010).
- 1182 50. Santos, R. E. R. S. *et al.* A DiCre recombinase-based system for inducible expression in *Leishmania major*.  
1183 *Molecular and biochemical parasitology* **216**, 45–48 (2017).
- 1184 51. Geoghegan, V., Jones, N. G., Dowle, A. & Mottram, J. C. Protein kinase signalling at  
1185 the *Leishmania* kinetochore captured by XL-BioID. *bioRxiv* (2021)  
1186 doi:<https://doi.org/10.1101/2021.07.08.451598>.

- 1187 52. Roux, K. J., Kim, D. I., Raida, M. & Burke, B. A promiscuous biotin ligase fusion protein identifies proximal  
1188 and interacting proteins in mammalian cells. *Journal of cell biology* **196**, 801–810 (2012).
- 1189 53. Baker, N. *et al.* Systematic functional analysis of Leishmania protein kinases identifies regulators of  
1190 differentiation or survival. *Nat Commun* **12**, 1244 (2021).
- 1191 54. Garcia-Silva, M. *et al.* Identification of the centromeres of Leishmania major: revealing the hidden pieces.  
1192 *Embo Rep* **18**, 1968–1977 (2017).
- 1193 55. Zhao, X. SUMO-Mediated Regulation of Nuclear Functions and Signaling Processes. *Mol Cell* **71**, 409–418  
1194 (2018).
- 1195 56. Liao, S., Wang, T., Fan, K. & Tu, X. The small ubiquitin-like modifier (SUMO) is essential in cell cycle  
1196 regulation in Trypanosoma brucei. *Exp Cell Res* **316**, 704–715 (2010).
- 1197 57. Mi, J. *et al.* Crystal structure of an ENT domain from Trypanosoma brucei. *Biochem Bioph Res Co* **505**, 755–  
1198 760 (2018).
- 1199 58. Chavali, G. B. *et al.* Crystal Structure of the ENT Domain of Human EMSY. *J Mol Biol* **350**, 964–973 (2005).
- 1200 59. Reynolds, D. *et al.* Regulation of transcription termination by glucosylated hydroxymethyluracil, base J, in  
1201 Leishmania major and Trypanosoma brucei. *Nucleic Acids Research* **42**, 9717–9729 (2014).
- 1202 60. Briggs, E., Hamilton, G., Crouch, K., Lapsley, C. & McCulloch, R. Genome-wide mapping reveals conserved  
1203 and diverged R-loop activities in the unusual genetic landscape of the African trypanosome genome. *Nucleic*  
1204 *Acids Res* **46**, gky928- (2018).
- 1205 61. Marques, C. A., Dickens, N. J., Paape, D., Campbell, S. J. & Mcculloch, R. Genome-wide mapping reveals  
1206 single-origin chromosome replication in Leishmania, a eukaryotic microbe. *Genome Biology* 1–12 (2015)  
1207 doi:10.1186/s13059-015-0788-9.
- 1208 62. Anderson, B. A. *et al.* Kinetoplastid-specific histone variant functions are conserved in Leishmania major.  
1209 *Molecular and biochemical parasitology* **191**, 53–57 (2013).
- 1210 63. Katiyar, S. *et al.* Lapatinib-binding protein kinases in the african trypanosome: identification of cellular  
1211 targets for kinase-directed chemical scaffolds. *PLoS ONE* **8**, e56150 (2013).
- 1212 64. Briggs, E. *et al.* Trypanosoma brucei ribonuclease H2A is an essential R-loop processing enzyme whose loss  
1213 causes DNA damage during transcription initiation and antigenic variation. *Nucleic Acids Res* **47**, 9180–9197  
1214 (2019).
- 1215 65. Kim, J. J. *et al.* Systematic bromodomain protein screens identify homologous recombination and R-loop  
1216 suppression pathways involved in genome integrity. *Gene Dev* **33**, 1751–1774 (2019).
- 1217 66. Floyd, S. R. *et al.* The bromodomain protein Brd4 insulates chromatin from DNA damage signalling. *Nature*  
1218 **498**, 246–250 (2013).
- 1219 67. Glover, L. & Horn, D. Trypanosomal histone  $\gamma$ H2A and the DNA damage response. *Mol Biochem Parasit*  
1220 **183**, 78–83 (2012).
- 1221 68. Gosavi, U., Srivastava, A., Badjatia, N. & Günzl, A. Rapid block of pre-mRNA splicing by chemical inhibition  
1222 of analog-sensitive CRK9 in Trypanosoma brucei. *Molecular Microbiology* **113**, 1225–1239 (2020).

- 1223 69. Jha, P. K., Khan, M. I., Mishra, A., Das, P. & Sinha, K. K. HAT2 mediates histone H4K4 acetylation and affects  
1224 micrococcal nuclease sensitivity of chromatin in *Leishmania donovani*. *PLoS ONE* **12**, e0177372 (2017).
- 1225 70. Oss, S. B. V., Cucinotta, C. E. & Arndt, K. M. Emerging Insights into the Roles of the Paf1 Complex in Gene  
1226 Regulation. *Trends Biochem Sci* **42**, 788–798 (2017).
- 1227 71. Wang, R. *et al.* Uncovering BRD4 hyperphosphorylation associated with cellular transformation in NUT  
1228 midline carcinoma. *Proc National Acad Sci* **114**, E5352–E5361 (2017).
- 1229 72. Wang, R., Yang, J. F., Ho, F., Robertson, E. S. & You, J. Bromodomain-Containing Protein BRD4 Is  
1230 Hyperphosphorylated in Mitosis. *Cancers* **12**, 1637 (2020).
- 1231 73. Peng, D. & Tarleton, R. Short Paper EuPaGDT : a web tool tailored to design CRISPR guide RNAs for  
1232 eukaryotic pathogens. 1–7 (2017) doi:10.1099/mgen.0.000033.
- 1233 74. Sunter, J. D. *et al.* *Leishmania* flagellum attachment zone is critical for flagellar pocket shape, development  
1234 in the sand fly, and pathogenicity in the host. *Proc National Acad Sci* **116**, 201812462 (2019).
- 1235 75. Kelley, L. A., Mezulis, S., Yates, C. M., Wass, M. N. & Sternberg, M. J. E. The Phyre2 web portal for protein  
1236 modeling, prediction and analysis. *Nat Protoc* **10**, 845–858 (2015).
- 1237  
1238
